# Supplementary material
Source: publisher site journal article supplement (doi:10.18632/aging.205223)
Supplement: Supplementary file 1 [file aging-v15-205223-supplementary-material-SD2.xlsx]

## Sheet: Sheet1
Supplementary Table 1. The DEGs between cuproptosis cluster A and cluster B.
Symbol	logFC	AveExpr	t	P.Value	adj.P.Val	B
SMC2	1.42936	4.56758	11.0811	1.97546e-21	2.74703e-17	38.0609
STIL	1.43101	3.82858	10.9536	4.38666e-21	2.74703e-17	37.2817
SMC4	1.71893	4.92712	10.9366	4.87725e-21	2.74703e-17	37.1782
TOP2A	1.72199	6.48715	10.8935	6.38398e-21	2.74703e-17	36.9152
TTF2	1.11198	3.51855	10.8075	1.09246e-20	3.76069e-17	36.3905
KIF15	1.38986	3.7049	10.6329	3.24291e-20	9.0953e-17	35.3277
RACGAP1	1.27782	5.40728	10.6118	3.69899e-20	9.0953e-17	35.1991
RRM1	1.27686	6.18542	10.4759	8.61339e-20	1.83687e-16	34.3735
ADAR	1.14163	7.63448	10.4583	9.60483e-20	1.83687e-16	34.2671
STAT1	1.64435	7.03155	10.2874	2.77279e-19	4.40965e-16	33.2315
HLTF	1.79821	3.99641	10.2848	2.81816e-19	4.40965e-16	33.2156
RMI1	1.18878	4.23177	10.2535	3.42018e-19	4.90568e-16	33.0265
PARP1	0.998592	5.83041	10.2307	3.93994e-19	5.14124e-16	32.8883
TOPBP1	1.20368	4.97604	10.221	4.18181e-19	5.14124e-16	32.8301
NUP205	1.20664	5.55211	10.1763	5.51437e-19	6.06004e-16	32.5599
JADE3	1.15077	4.39575	10.1722	5.65533e-19	6.06004e-16	32.5353
FAM72B	1.08241	1.8624	10.163	5.9854e-19	6.06004e-16	32.4799
URB2	1.16963	4.20123	10.1521	6.40309e-19	6.12277e-16	32.414
DHX9	0.92343	7.14341	10.1356	7.08881e-19	6.42172e-16	32.3146
HASPIN	1.12627	2.69368	10.1099	8.30851e-19	7.1503e-16	32.1595
E2F8	1.38927	3.01226	10.0977	8.95918e-19	7.34312e-16	32.0859
RFWD3	1.13544	5.00591	10.0587	1.14012e-18	8.91992e-16	31.8504
KIF18A	1.29285	3.43786	10.0156	1.48687e-18	1.04867e-15	31.5911
CKAP2L	1.35974	3.47404	10.0147	1.49533e-18	1.04867e-15	31.5855
CKAP5	1.18732	6.26581	10.0117	1.52316e-18	1.04867e-15	31.5675
ASCC3	1.18471	4.27698	9.95948	2.1006e-18	1.35596e-15	31.2535
NDC1	1.12725	5.49266	9.95744	2.12707e-18	1.35596e-15	31.2413
SMCHD1	1.26002	4.36765	9.94305	2.32401e-18	1.36032e-15	31.1548
PATL1	1.08601	5.83366	9.94189	2.34073e-18	1.36032e-15	31.1478
ECT2	1.50063	5.31404	9.93894	2.38351e-18	1.36032e-15	31.1301
NUP153	1.43707	5.59944	9.93447	2.45003e-18	1.36032e-15	31.1033
KIF14	1.44755	3.29309	9.90026	3.0238e-18	1.59113e-15	30.8977
CENPE	1.31132	3.45066	9.89882	3.05063e-18	1.59113e-15	30.8891
BUB1	1.43367	4.68639	9.86755	3.6969e-18	1.8715e-15	30.7014
ASPM	1.55481	4.0373	9.85459	4.00332e-18	1.96872e-15	30.6237
HPS3	1.19179	3.87684	9.82169	4.89942e-18	2.34247e-15	30.4264
DCAF1	0.923191	4.40758	9.77811	6.40108e-18	2.9327e-15	30.1653
USP1	1.42731	6.48426	9.77624	6.47471e-18	2.9327e-15	30.1541
NEMP1	1.15426	4.39997	9.74152	8.00996e-18	3.53506e-15	29.9463
DBR1	0.852129	4.58738	9.72767	8.71916e-18	3.67663e-15	29.8634
POLR2B	1.2816	6.06769	9.72375	8.93118e-18	3.67663e-15	29.84
SUZ12	1.08824	4.77621	9.72301	8.97157e-18	3.67663e-15	29.8356
HEATR1	1.37454	4.7068	9.70758	9.86048e-18	3.94694e-15	29.7433
XPOT	0.987738	6.08783	9.68739	1.11576e-17	4.36466e-15	29.6226
API5	0.90561	6.3119	9.63282	1.55768e-17	5.95794e-15	29.2968
PHF6	1.09646	4.30693	9.61478	1.73916e-17	6.50747e-15	29.1891
TAF2	1.27256	4.91959	9.60894	1.8023e-17	6.60027e-15	29.1543
IARS1	1.13007	6.17669	9.56894	2.30075e-17	8.25009e-15	28.9159
NUP160	1.25182	4.9994	9.55167	2.5563e-17	8.9794e-15	28.813
SGO2	1.10302	3.39554	9.54665	2.63576e-17	9.07334e-15	28.7831
MSH6	1.16849	5.09308	9.51703	3.15722e-17	1.06553e-14	28.6068
WDR3	1.01185	4.37641	9.50959	3.30355e-17	1.09348e-14	28.5626
ATP11C	1.08316	4.16948	9.50008	3.50071e-17	1.13687e-14	28.506
KIF20B	1.15673	3.5856	9.48784	3.77158e-17	1.20216e-14	28.4332
MSH2	1.11994	4.19924	9.47908	3.97802e-17	1.2449e-14	28.3812
ZNF367	1.28556	3.6385	9.46875	4.23626e-17	1.27988e-14	28.3198
VRK2	1.07395	4.39958	9.46866	4.23851e-17	1.27988e-14	28.3192
NUP210	1.71336	5.69312	9.45299	4.66253e-17	1.38365e-14	28.2261
KPNB1	0.831884	6.42553	9.45003	4.74705e-17	1.38485e-14	28.2086
BORA	1.04812	2.97707	9.44659	4.84756e-17	1.3906e-14	28.1881
SGO1	1.12402	2.83655	9.43301	5.26472e-17	1.46532e-14	28.1075
CIP2A	1.22827	3.71061	9.43259	5.27829e-17	1.46532e-14	28.105
PRIM1	1.03908	2.80417	9.41547	5.85709e-17	1.59703e-14	28.0034
HAUS6	1.15044	3.8409	9.40923	6.08332e-17	1.59703e-14	27.9664
PRPF40A	0.901995	5.61122	9.40912	6.08749e-17	1.59703e-14	27.9657
NBN	1.01441	5.78577	9.40813	6.12388e-17	1.59703e-14	27.9599
NCAPG	1.31606	4.23169	9.40258	6.33387e-17	1.62714e-14	27.927
OSBPL11	0.88662	4.37736	9.39412	6.66813e-17	1.68776e-14	27.8768
GLE1	0.854838	5.37354	9.39172	6.76595e-17	1.68776e-14	27.8626
SENP1	0.975731	3.96743	9.37477	7.49929e-17	1.84397e-14	27.7621
NUP107	0.917099	4.55588	9.36903	7.76513e-17	1.88244e-14	27.7281
DEPDC1B	1.17784	3.24123	9.36578	7.91987e-17	1.89329e-14	27.7088
USP14	0.993479	5.87173	9.35131	8.64643e-17	2.03866e-14	27.6231
FIGNL1	1.0849	3.92105	9.3367	9.44765e-17	2.19747e-14	27.5366
ESCO2	1.06167	2.26059	9.32317	1.02548e-16	2.35341e-14	27.4565
CLSPN	1.25061	2.88972	9.32043	1.04268e-16	2.36139e-14	27.4403
DNMT1	1.14036	4.98129	9.3151	1.07688e-16	2.40718e-14	27.4088
NUP98	0.891336	5.40538	9.29984	1.18117e-16	2.60645e-14	27.3185
KIF24	0.96249	2.63554	9.27948	1.33616e-16	2.91114e-14	27.1982
GMPS	0.985406	5.83048	9.27335	1.38669e-16	2.95386e-14	27.1619
LMNB1	1.18233	6.29828	9.27294	1.39009e-16	2.95386e-14	27.1595
DCK	1.03408	4.81455	9.26082	1.49592e-16	3.13998e-14	27.0879
RC3H2	1.11796	4.29251	9.25847	1.51733e-16	3.14653e-14	27.074
DDX46	0.9641	4.73561	9.24093	1.68711e-16	3.45696e-14	26.9705
RBBP4	1.1294	5.6279	9.22176	1.89443e-16	3.83611e-14	26.8573
ZBTB24	0.907172	3.81828	9.2151	1.97214e-16	3.94703e-14	26.8181
POLA1	0.928143	2.90961	9.20679	2.07365e-16	4.0987e-14	26.7691
COA7	0.884006	5.08458	9.20497	2.09665e-16	4.0987e-14	26.7583
EPB41	1.14802	3.24702	9.20318	2.11936e-16	4.0987e-14	26.7478
FMR1	0.942885	4.65941	9.20053	2.15361e-16	4.11867e-14	26.7321
CENPF	1.54857	5.60689	9.18965	2.29983e-16	4.34997e-14	26.668
CENPI	1.15138	3.00375	9.17534	2.50732e-16	4.6717e-14	26.5837
EAF1	0.864457	4.02103	9.17423	2.52421e-16	4.6717e-14	26.5771
BUB1B	1.2796	4.10359	9.16576	2.65645e-16	4.86413e-14	26.5273
NFATC3	1.11479	3.24617	9.16057	2.74096e-16	4.96605e-14	26.4967
OPA1	0.980616	5.16077	9.15569	2.82281e-16	5.06107e-14	26.468
TMPO	1.03561	5.74203	9.13528	3.19243e-16	5.66476e-14	26.3479
CNOT1	1.46807	5.45112	9.13032	3.28929e-16	5.77707e-14	26.3187
NOL11	0.924038	5.68885	9.10177	3.90661e-16	6.79197e-14	26.1508
PLK4	1.14893	3.62778	9.0926	4.12837e-16	7.10575e-14	26.0969
GTF2E1	0.738407	4.21643	9.08841	4.23371e-16	7.21491e-14	26.0723
DDX21	1.15627	6.59357	9.08276	4.38023e-16	7.39143e-14	26.0391
KNL1	1.09802	2.81392	9.0774	4.52369e-16	7.55939e-14	26.0076
ATAD5	1.00539	2.54416	9.07489	4.59255e-16	7.60067e-14	25.9929
ATR	0.816088	2.6594	9.06505	4.87244e-16	7.95839e-14	25.9351
HNRNPU	0.68471	6.62923	9.063	4.93302e-16	7.95839e-14	25.9231
STAG2	1.00494	5.62563	9.06251	4.94741e-16	7.95839e-14	25.9202
PALB2	0.867462	3.74161	9.05535	5.16517e-16	8.23175e-14	25.8782
KNTC1	1.01957	3.53699	9.04697	5.43219e-16	8.57787e-14	25.829
TYMS	1.47194	3.80132	9.04447	5.51439e-16	8.62851e-14	25.8143
GFM1	0.861517	4.3198	9.02487	6.20346e-16	9.61928e-14	25.6994
LRP8	1.03514	2.09729	9.01726	6.49359e-16	9.97926e-14	25.6548
MCM2	1.59405	4.97627	9.00697	6.90717e-16	1.05209e-13	25.5945
GAS2L3	1.11605	2.88121	8.99621	7.36793e-16	1.10475e-13	25.5315
CCNA2	1.31798	5.44503	8.99539	7.4046e-16	1.10475e-13	25.5266
CEP85	1.08636	4.18871	8.99447	7.44545e-16	1.10475e-13	25.5213
MMS22L	1.03982	2.27012	8.99298	7.51218e-16	1.10513e-13	25.5126
THOC2	0.895069	4.67547	8.98867	7.70908e-16	1.12448e-13	25.4873
FBXO45	1.00971	4.5843	8.98724	7.77527e-16	1.1246e-13	25.479
ATP13A3	1.18231	4.99699	8.98251	7.99903e-16	1.14733e-13	25.4513
PPAT	1.1586	4.1102	8.97335	8.45096e-16	1.20213e-13	25.3976
EPRS1	1.03437	7.49178	8.95726	9.30648e-16	1.31298e-13	25.3035
PARPBP	0.914772	2.46855	8.95407	9.48639e-16	1.32748e-13	25.2848
POLQ	1.02337	2.41301	8.94533	9.99615e-16	1.38753e-13	25.2337
RNF20	0.863055	5.44551	8.93711	1.05008e-15	1.44591e-13	25.1857
SMC3	1.09909	5.77188	8.92369	1.13793e-15	1.55445e-13	25.1073
USP24	1.00243	4.72441	8.92204	1.14919e-15	1.55747e-13	25.0976
CDK12	0.95996	4.22341	8.91855	1.17345e-15	1.57792e-13	25.0773
RBM12	0.736838	5.29724	8.90993	1.23559e-15	1.6486e-13	25.0269
HUWE1	1.0893	6.21964	8.90193	1.29614e-15	1.71609e-13	24.9802
CKAP2	1.15069	5.1253	8.89476	1.35295e-15	1.7749e-13	24.9383
EXO1	1.34174	4.31904	8.89375	1.36119e-15	1.7749e-13	24.9324
ATAD2	1.35304	5.64781	8.88402	1.44265e-15	1.86699e-13	24.8757
XRN1	1.01112	3.89352	8.88	1.47778e-15	1.8921e-13	24.8522
ADNP2	1.07248	4.38564	8.87813	1.49439e-15	1.8921e-13	24.8413
MED1	1.10654	4.46151	8.87806	1.49503e-15	1.8921e-13	24.8409
ERCC6L	1.12385	3.11868	8.86258	1.63989e-15	2.06028e-13	24.7506
NUP133	0.951955	5.42464	8.84847	1.78405e-15	2.22515e-13	24.6684
KPNA6	0.910142	5.3533	8.8453	1.81818e-15	2.24649e-13	24.6499
RLF	0.962754	4.32739	8.84372	1.83538e-15	2.24649e-13	24.6407
MSL2	0.867396	4.8494	8.84315	1.84159e-15	2.24649e-13	24.6374
DESI2	1.01429	6.11479	8.84208	1.85336e-15	2.24649e-13	24.6312
FBXO5	1.18275	3.90935	8.83165	1.97242e-15	2.37407e-13	24.5705
FOXM1	1.6464	5.55416	8.82955	1.99736e-15	2.3874e-13	24.5582
CGAS	1.22455	3.73992	8.81067	2.23546e-15	2.63817e-13	24.4483
HMMR	1.14928	4.03635	8.81049	2.23782e-15	2.63817e-13	24.4473
BAZ1B	0.897459	6.30175	8.80888	2.25933e-15	2.64542e-13	24.4379
CS	0.74521	6.36046	8.80714	2.28295e-15	2.65501e-13	24.4278
KDM3B	0.919883	5.28579	8.8059	2.29984e-15	2.6567e-13	24.4206
NCOA6	0.921114	4.74489	8.79717	2.42274e-15	2.77305e-13	24.3698
SEMA4D	0.912226	3.59337	8.79647	2.43279e-15	2.77305e-13	24.3658
KIF4A	1.27681	4.96838	8.7933	2.47928e-15	2.80746e-13	24.3473
SASS6	0.992472	3.27588	8.79197	2.49905e-15	2.81135e-13	24.3395
AHCTF1	1.02371	4.92446	8.79005	2.52779e-15	2.81804e-13	24.3284
RAF1	1.21881	4.24595	8.78939	2.53775e-15	2.81804e-13	24.3245
DEPDC1	1.2846	3.65384	8.78339	2.62999e-15	2.90176e-13	24.2897
CDC40	1.01773	3.85496	8.76097	3.00569e-15	3.29516e-13	24.1594
RNMT	1.05157	4.72792	8.7584	3.05196e-15	3.32471e-13	24.1445
KIF11	1.20801	5.12599	8.75402	3.13255e-15	3.37392e-13	24.1191
DBF4	0.847345	4.14059	8.75313	3.14922e-15	3.37392e-13	24.1139
ZBTB39	0.928775	2.96648	8.75277	3.15594e-15	3.37392e-13	24.1118
UPF2	0.992871	5.3924	8.74497	3.30583e-15	3.51234e-13	24.0665
GTF3C4	1.12472	4.59822	8.74254	3.35391e-15	3.53678e-13	24.0525
LIN9	1.07059	3.75993	8.74096	3.38561e-15	3.53678e-13	24.0433
TIMELESS	1.02437	4.96347	8.74072	3.39047e-15	3.53678e-13	24.0419
MOB1A	0.6999	6.55167	8.73147	3.58213e-15	3.71419e-13	23.9882
CCDC18	0.826955	2.47709	8.72681	3.68287e-15	3.79578e-13	23.9612
DCAF7	0.892073	6.22956	8.72458	3.73209e-15	3.82362e-13	23.9482
RAD51AP1	1.42514	4.77207	8.72277	3.7723e-15	3.84194e-13	23.9377
TAP1	1.70971	6.57593	8.72045	3.82483e-15	3.87253e-13	23.9243
NCBP1	0.914284	5.21599	8.71394	3.97553e-15	4.00157e-13	23.8866
KDM1B	1.21819	4.62158	8.71193	4.02335e-15	4.02616e-13	23.8749
TUT4	0.920957	3.14374	8.70962	4.07887e-15	4.05813e-13	23.8615
LIN54	0.831577	3.29859	8.69165	4.53846e-15	4.48942e-13	23.7573
ZMYM4	0.951671	5.20792	8.68793	4.63957e-15	4.56322e-13	23.7358
DOCK7	1.0905	3.29141	8.68377	4.75573e-15	4.6463e-13	23.7117
CCNT1	0.903825	4.11425	8.68298	4.77803e-15	4.6463e-13	23.7072
NOL8	0.772725	4.22013	8.67823	4.91449e-15	4.75215e-13	23.6797
LSM12	0.749694	3.73694	8.67571	4.98851e-15	4.77177e-13	23.6651
AFG3L2	1.11989	4.87021	8.675	5.00969e-15	4.77177e-13	23.661
MTMR1	0.878361	4.59698	8.67397	5.04038e-15	4.77177e-13	23.655
DHX36	0.997091	4.47291	8.67379	5.04568e-15	4.77177e-13	23.654
R3HDM1	0.898944	4.5347	8.67174	5.10766e-15	4.78979e-13	23.6421
MPHOSPH9	0.952132	2.55273	8.67128	5.12159e-15	4.78979e-13	23.6394
SF3B3	0.903838	6.07017	8.6704	5.14822e-15	4.78979e-13	23.6344
KPNA2	1.08952	6.61115	8.66795	5.22354e-15	4.83374e-13	23.6202
HPSE	1.03645	2.6653	8.66655	5.26726e-15	4.84814e-13	23.612
ZZZ3	0.895804	4.33054	8.6531	5.70438e-15	5.22254e-13	23.5343
RBMXL1	0.909976	3.96565	8.65103	5.77502e-15	5.23259e-13	23.5223
SET	0.79179	8.32619	8.65006	5.8083e-15	5.23259e-13	23.5167
CYRIB	0.802375	5.25936	8.64979	5.81769e-15	5.23259e-13	23.5151
XPO1	0.82909	4.8869	8.64923	5.83696e-15	5.23259e-13	23.5119
CBLL1	0.776346	4.58697	8.64659	5.92882e-15	5.2874e-13	23.4966
RAD54L	1.16751	3.13665	8.64277	6.06452e-15	5.38054e-13	23.4745
HMGXB4	0.916117	4.30038	8.63929	6.19113e-15	5.4647e-13	23.4544
RNF169	1.27023	3.08535	8.63768	6.25055e-15	5.489e-13	23.4451
CASP8AP2	1.28749	3.79039	8.63159	6.47994e-15	5.66156e-13	23.4099
TPR	1.05774	5.68102	8.63034	6.52833e-15	5.67503e-13	23.4026
POLR1B	0.918481	4.13503	8.62318	6.81111e-15	5.8911e-13	23.3613
DKC1	0.873367	6.68067	8.62228	6.84735e-15	5.89283e-13	23.3561
LRRC40	0.944182	4.59173	8.61649	7.08611e-15	6.06797e-13	23.3227
DIAPH1	0.853393	6.30733	8.61087	7.32563e-15	6.24201e-13	23.2902
TOP2B	0.957825	6.7936	8.60452	7.60625e-15	6.41309e-13	23.2536
MKI67	1.41207	5.36838	8.60433	7.61509e-15	6.41309e-13	23.2524
NRDC	0.641976	6.33758	8.60381	7.63818e-15	6.41309e-13	23.2495
PRKDC	1.35851	6.42303	8.6001	7.80787e-15	6.52374e-13	23.228
UBQLN1	0.850922	6.25193	8.59911	7.85372e-15	6.53035e-13	23.2223
NAA15	0.916065	4.66799	8.59472	8.06042e-15	6.64048e-13	23.197
INCENP	1.0703	4.81418	8.59466	8.06333e-15	6.64048e-13	23.1966
ZNF724	0.827917	1.26821	8.59121	8.22944e-15	6.74501e-13	23.1767
RIF1	1.08221	3.9904	8.58125	8.7289e-15	7.12047e-13	23.1193
NUP54	0.837298	5.15756	8.57377	9.1233e-15	7.40708e-13	23.0762
CCP110	1.0949	3.39349	8.5697	9.34506e-15	7.55151e-13	23.0527
STRBP	0.913083	4.58367	8.565	9.60825e-15	7.72791e-13	23.0256
CAND1	1.04284	5.34538	8.55934	9.93529e-15	7.95378e-13	22.993
UHRF1BP1	1.04559	3.78626	8.55451	1.02229e-14	8.14615e-13	22.9652
CEBPZ	1.11038	5.23683	8.54732	1.06663e-14	8.46029e-13	22.9237
QTRT2	0.804487	3.90477	8.53949	1.11708e-14	8.81164e-13	22.8787
RSRC1	0.816271	4.18949	8.53887	1.12117e-14	8.81164e-13	22.8751
BRCC3	0.958992	5.33484	8.53414	1.15287e-14	9.0196e-13	22.8479
CNTRL	0.968416	3.38853	8.52617	1.20838e-14	9.41117e-13	22.802
HNRNPK	0.586332	8.58901	8.52117	1.24459e-14	9.64948e-13	22.7732
GAPVD1	0.833552	3.74874	8.51199	1.31376e-14	1.01401e-12	22.7205
TBC1D31	0.812002	2.74847	8.50684	1.35429e-14	1.04062e-12	22.6908
SMARCA5	0.894968	5.7424	8.50453	1.3729e-14	1.05024e-12	22.6775
FANCA	1.1108	2.93342	8.49686	1.43636e-14	1.09392e-12	22.6335
CXCL10	2.45755	7.47392	8.49235	1.475e-14	1.1184e-12	22.6076
RAD18	0.888814	3.80142	8.48629	1.52859e-14	1.15395e-12	22.5728
RBM15	0.631881	3.73194	8.48449	1.54492e-14	1.15885e-12	22.5624
TPX2	1.30973	6.96853	8.48409	1.54855e-14	1.15885e-12	22.5601
NUS1	0.83782	5.04342	8.48318	1.55687e-14	1.16004e-12	22.5549
ANKRD17	1.07333	5.2093	8.48057	1.58095e-14	1.1729e-12	22.5399
HCFC1	0.839577	5.5374	8.45624	1.82431e-14	1.34764e-12	22.4003
INTS7	0.917629	5.00548	8.45516	1.83597e-14	1.35046e-12	22.3941
SRP72	0.936529	6.3549	8.45297	1.85983e-14	1.36219e-12	22.3815
PDCD10	0.847152	5.64916	8.44825	1.91213e-14	1.39456e-12	22.3544
NAA35	0.883305	4.07734	8.44088	1.99685e-14	1.44871e-12	22.3121
NUP188	0.8374	5.09007	8.44034	2.00322e-14	1.44871e-12	22.309
NCAPD2	1.24099	6.41672	8.43708	2.04198e-14	1.47056e-12	22.2903
CEP192	1.08524	3.72293	8.43502	2.06685e-14	1.48228e-12	22.2785
TTI1	0.817033	4.8693	8.43215	2.1019e-14	1.50116e-12	22.2621
NCAPG2	1.12223	4.55556	8.42224	2.22798e-14	1.58463e-12	22.2053
STAG1	1.23451	4.04611	8.42019	2.255e-14	1.59725e-12	22.1936
VBP1	0.813333	6.57828	8.41547	2.31829e-14	1.63534e-12	22.1666
CEP295	1.0978	2.43713	8.40831	2.41793e-14	1.69867e-12	22.1255
PRIM2	0.878978	3.9146	8.40564	2.45605e-14	1.71678e-12	22.1103
ESCO1	0.887585	4.27507	8.40512	2.46366e-14	1.71678e-12	22.1073
ZUP1	0.736988	3.95136	8.40284	2.49684e-14	1.73289e-12	22.0942
ORC1	1.17954	3.85521	8.40123	2.52043e-14	1.73704e-12	22.085
QSER1	1.20125	4.57208	8.40047	2.5317e-14	1.73704e-12	22.0807
E2F3	1.16041	5.08639	8.39977	2.5422e-14	1.73704e-12	22.0767
DCLRE1B	0.918047	4.13649	8.3997	2.5432e-14	1.73704e-12	22.0763
ZNF28	0.988651	3.63307	8.39708	2.58268e-14	1.75221e-12	22.0612
MCM6	1.07023	6.34162	8.39687	2.58576e-14	1.75221e-12	22.0601
DEK	1.36933	6.70145	8.39107	2.67527e-14	1.8049e-12	22.0269
THRAP3	0.699638	6.9812	8.39049	2.68449e-14	1.8049e-12	22.0235
YES1	1.10589	6.17729	8.38757	2.73087e-14	1.82894e-12	22.0068
ZNF845	0.804813	2.98483	8.3864	2.74958e-14	1.83433e-12	22.0002
EPS15	0.710617	5.27692	8.37488	2.94175e-14	1.95396e-12	21.9343
STARD7	0.746708	7.36815	8.37431	2.9516e-14	1.95396e-12	21.931
DIAPH3	1.18027	3.10553	8.36991	3.02878e-14	1.99737e-12	21.9059
DDIAS	1.05963	3.09654	8.36852	3.05355e-14	2.00602e-12	21.8979
BPTF	1.10239	4.30999	8.36685	3.08361e-14	2.01083e-12	21.8884
CPSF6	0.667393	5.33793	8.36681	3.08424e-14	2.01083e-12	21.8882
MTBP	1.02716	2.63903	8.36134	3.18467e-14	2.06847e-12	21.8569
ANKRD28	0.945213	4.0739	8.34449	3.51506e-14	2.27448e-12	21.7607
CENPN	0.969645	3.53375	8.34176	3.57165e-14	2.30244e-12	21.7451
PTBP3	1.03084	6.06299	8.33995	3.60969e-14	2.31829e-12	21.7348
USP10	0.811211	5.88944	8.33744	3.66307e-14	2.34382e-12	21.7205
FAM83D	1.38917	5.39203	8.33516	3.7123e-14	2.36298e-12	21.7074
BRIP1	1.09799	2.44967	8.33479	3.72047e-14	2.36298e-12	21.7053
TBK1	0.593935	2.89918	8.33366	3.74499e-14	2.36981e-12	21.6989
GTF2I	1.12001	3.15743	8.3312	3.79945e-14	2.39546e-12	21.6848
FANCD2	0.956685	3.39143	8.33029	3.81957e-14	2.39936e-12	21.6797
DCAF12	0.893512	6.12153	8.32758	3.88071e-14	2.4289e-12	21.6642
MIER1	0.836006	4.22961	8.32659	3.90335e-14	2.43422e-12	21.6585
TAF5L	0.821966	4.67576	8.32346	3.97531e-14	2.47014e-12	21.6407
CEP76	0.80454	2.47526	8.32243	3.99944e-14	2.4762e-12	21.6348
ANLN	1.39671	5.37393	8.30092	4.53532e-14	2.79792e-12	21.5122
ADAM17	1.07445	3.74377	8.2959	4.67038e-14	2.87095e-12	21.4836
DNA2	1.15872	3.26477	8.29407	4.72062e-14	2.89151e-12	21.4732
RFC1	0.950273	4.96717	8.29176	4.78484e-14	2.91795e-12	21.46
EYA3	0.833577	4.3003	8.2913	4.7977e-14	2.91795e-12	21.4574
POLD3	0.911006	4.46235	8.28982	4.83915e-14	2.9328e-12	21.449
NCAPD3	0.944862	3.8674	8.28411	5.00328e-14	3.02163e-12	21.4165
NUP155	1.12048	4.72246	8.27807	5.18298e-14	3.11921e-12	21.3821
CCSAP	0.980128	3.98545	8.27575	5.25359e-14	3.15069e-12	21.3689
ANAPC1	0.959793	2.83884	8.2738	5.3136e-14	3.17562e-12	21.3578
CYB5R4	0.805493	2.99585	8.2728	5.34483e-14	3.18001e-12	21.3521
TTC13	0.889924	4.66266	8.27238	5.35791e-14	3.18001e-12	21.3497
SNRNP40	0.769794	5.4351	8.27044	5.41908e-14	3.20527e-12	21.3386
GBP1	1.67142	6.37961	8.26699	5.52911e-14	3.25915e-12	21.319
PHF3	0.89908	3.96656	8.26569	5.57117e-14	3.27273e-12	21.3116
XRN2	0.961974	6.79512	8.25948	5.77675e-14	3.38195e-12	21.2763
M6PR	1.13942	5.98191	8.25771	5.83681e-14	3.40553e-12	21.2662
TDRD7	0.983917	4.14257	8.25687	5.86532e-14	3.40587e-12	21.2615
ZBTB6	0.93897	3.64807	8.25653	5.87696e-14	3.40587e-12	21.2595
ARHGAP11A	1.06242	3.67966	8.25574	5.90407e-14	3.40668e-12	21.2551
CCAR1	0.716929	5.58191	8.25534	5.91794e-14	3.40668e-12	21.2528
MTMR4	0.979914	4.80751	8.24688	6.21742e-14	3.56714e-12	21.2046
ZNF124	0.953374	2.83606	8.2439	6.32629e-14	3.61755e-12	21.1877
ROCK1	1.1225	4.38434	8.23483	6.66972e-14	3.8013e-12	21.1362
SMG1	0.988879	4.11791	8.22919	6.89255e-14	3.91533e-12	21.1041
TRAPPC8	0.92479	4.06105	8.22314	7.13981e-14	4.04245e-12	21.0698
SNRNP200	0.939996	6.65511	8.22191	7.19101e-14	4.05809e-12	21.0628
HBS1L	0.922206	4.46839	8.21819	7.34834e-14	4.13332e-12	21.0417
SRPK1	1.0712	4.96081	8.21138	7.64547e-14	4.28644e-12	21.0031
SETD2	0.820171	4.83105	8.20989	7.71208e-14	4.30975e-12	20.9946
PAK2	0.878998	6.35104	8.20855	7.77254e-14	4.32948e-12	20.987
SPIN4	1.18238	3.31987	8.20609	7.88445e-14	4.37765e-12	20.9731
IFIH1	1.46348	5.34068	8.20227	8.0618e-14	4.46172e-12	20.9514
C1orf112	1.00939	3.28044	8.19963	8.18671e-14	4.50768e-12	20.9364
CDV3	0.775021	7.20044	8.19941	8.1972e-14	4.50768e-12	20.9352
COPB2	0.766634	5.62615	8.19782	8.2735e-14	4.53514e-12	20.9261
HNRNPLL	0.751031	4.68499	8.19619	8.35225e-14	4.56377e-12	20.9169
GART	0.869911	5.60633	8.19155	8.58067e-14	4.67031e-12	20.8906
RINT1	0.88133	4.03664	8.19113	8.60148e-14	4.67031e-12	20.8882
ZC3HAV1	0.79235	4.80021	8.18749	8.78548e-14	4.75521e-12	20.8676
PIK3R4	0.887257	4.662	8.18438	8.94577e-14	4.81225e-12	20.85
HOOK1	1.13982	4.19532	8.18436	8.94678e-14	4.81225e-12	20.8499
G3BP1	0.702373	5.03212	8.182	9.07041e-14	4.86355e-12	20.8365
CIT	0.840834	2.1649	8.1806	9.14445e-14	4.88802e-12	20.8286
KLHL11	0.944176	1.55216	8.17578	9.40445e-14	5.00222e-12	20.8012
SINHCAF	1.31862	5.3706	8.17556	9.41621e-14	5.00222e-12	20.8
TRRAP	0.862031	4.24451	8.17109	9.66442e-14	5.11828e-12	20.7747
TRIM14	1.13692	5.21267	8.16973	9.74106e-14	5.14304e-12	20.767
ASXL2	0.956599	3.74945	8.16601	9.95389e-14	5.23934e-12	20.7459
RAB8A	0.626326	3.94723	8.16109	1.02421e-13	5.37459e-12	20.7181
HIVEP1	1.01556	3.62727	8.16007	1.03028e-13	5.39001e-12	20.7123
MCM10	1.34525	4.00991	8.15378	1.06861e-13	5.57359e-12	20.6767
MARS2	0.930577	3.86751	8.15279	1.0748e-13	5.58894e-12	20.6711
USP33	0.833911	4.97414	8.14976	1.09386e-13	5.67091e-12	20.6539
RLIM	0.853415	4.65699	8.14862	1.10109e-13	5.68778e-12	20.6475
IPO7	1.02438	6.4236	8.14784	1.1061e-13	5.68778e-12	20.6431
DTX3L	1.10231	5.85423	8.1477	1.10702e-13	5.68778e-12	20.6423
TOP1	0.797786	6.68129	8.14716	1.11047e-13	5.6885e-12	20.6392
RFFL	0.825743	2.8441	8.14219	1.14299e-13	5.83774e-12	20.6111
FBXO11	0.997158	3.91571	8.13669	1.18005e-13	6.00917e-12	20.58
WDHD1	1.0476	3.59317	8.13501	1.1916e-13	6.05008e-12	20.5705
NSD2	0.9575	4.1441	8.13068	1.22187e-13	6.18552e-12	20.5461
SOS1	0.901017	4.80231	8.12917	1.23266e-13	6.22186e-12	20.5375
DDX18	0.88896	5.55219	8.12282	1.27891e-13	6.42745e-12	20.5016
ZNF770	1.41782	3.75691	8.12246	1.28157e-13	6.42745e-12	20.4996
HARBI1	0.659858	3.04895	8.12205	1.28459e-13	6.42745e-12	20.4973
NDC80	1.27186	4.78717	8.11943	1.30429e-13	6.5071e-12	20.4824
USP42	0.698489	3.56257	8.11667	1.3253e-13	6.59279e-12	20.4669
RNGTT	0.841805	4.19049	8.11381	1.34747e-13	6.68378e-12	20.4507
NEK4	0.86927	3.40121	8.11237	1.3587e-13	6.71422e-12	20.4426
UBXN7	1.02995	4.34042	8.11203	1.36141e-13	6.71422e-12	20.4407
RNF213	1.11567	4.89998	8.10976	1.3794e-13	6.78352e-12	20.4279
MCM9	0.785719	2.62665	8.10555	1.41347e-13	6.93124e-12	20.4041
CEP135	0.859346	2.49397	8.10442	1.42278e-13	6.95708e-12	20.3977
CAPRIN1	0.939881	7.06379	8.10313	1.43344e-13	6.98935e-12	20.3904
ZNF267	0.77129	3.52659	8.10202	1.44271e-13	7.01467e-12	20.3841
RRP1B	0.857296	5.62401	8.09943	1.46446e-13	7.10036e-12	20.3696
ARL5B	1.02547	4.67273	8.09813	1.47552e-13	7.1339e-12	20.3622
TRIM37	1.03164	4.64598	8.09198	1.52903e-13	7.37191e-12	20.3275
BLM	1.07285	2.96507	8.08998	1.54682e-13	7.43682e-12	20.3162
ZYG11B	0.835893	4.18465	8.08932	1.55278e-13	7.44467e-12	20.3125
NR2C2	1.03971	3.62235	8.08873	1.55807e-13	7.44929e-12	20.3092
RBMX	0.637953	6.81553	8.08794	1.56522e-13	7.45139e-12	20.3047
SMARCAD1	0.976317	4.3429	8.08716	1.57229e-13	7.45139e-12	20.3003
NOC3L	0.799929	4.22911	8.08698	1.5739e-13	7.45139e-12	20.2993
DDX20	0.709824	4.03378	8.08667	1.57678e-13	7.45139e-12	20.2975
ALMS1	0.910044	3.29236	8.0863	1.58015e-13	7.45139e-12	20.2955
MED14	0.946337	4.68174	8.08415	1.59995e-13	7.5234e-12	20.2833
OTUD4	0.934678	4.28462	8.08369	1.60416e-13	7.5234e-12	20.2808
SETD5	0.908794	5.28147	8.07818	1.65614e-13	7.74606e-12	20.2497
DNM1L	0.85505	5.43463	8.07676	1.66982e-13	7.78888e-12	20.2417
SPTY2D1	0.856982	4.47003	8.06871	1.7494e-13	8.13803e-12	20.1963
USP15	0.591088	3.16193	8.0658	1.77904e-13	8.25358e-12	20.1799
RBBP5	0.82917	5.10341	8.06273	1.81095e-13	8.37904e-12	20.1626
GK	0.801821	2.39118	8.05646	1.8778e-13	8.66506e-12	20.1273
FKTN	0.767285	2.18318	8.05321	1.91331e-13	8.80184e-12	20.109
RANBP9	1.00668	5.51822	8.05282	1.91767e-13	8.80184e-12	20.1068
SMAP1	0.976444	2.92327	8.04419	2.01573e-13	9.22732e-12	20.0582
FAM210A	0.834418	3.8286	8.04091	2.05425e-13	9.37869e-12	20.0398
DCUN1D1	0.809532	4.274	8.03757	2.09419e-13	9.53576e-12	20.021
LBR	0.980541	5.5223	8.03103	2.17486e-13	9.85962e-12	19.9841
FANCC	0.784218	2.81673	8.03087	2.17677e-13	9.85962e-12	19.9833
SERF2	-0.750147	6.04142	-8.02862	2.20527e-13	9.9625e-12	19.9706
CAPZA1	0.649229	7.53542	8.0249	2.25313e-13	1.01392e-11	19.9497
SCAF11	0.910169	4.64168	8.02467	2.25618e-13	1.01392e-11	19.9484
FANCI	1.11485	3.82271	8.02403	2.26441e-13	1.01476e-11	19.9448
CTCF	0.665597	4.58643	8.02362	2.26984e-13	1.01476e-11	19.9425
MMGT1	0.945216	5.28712	8.0221	2.28978e-13	1.02103e-11	19.934
C3orf38	0.71907	4.42885	8.02083	2.30669e-13	1.02591e-11	19.9268
CEP170	1.05592	3.64279	8.02005	2.31705e-13	1.02786e-11	19.9224
NANP	0.78351	3.51472	8.01825	2.34126e-13	1.03593e-11	19.9123
DENND1A	0.698808	3.43383	8.01501	2.38545e-13	1.05278e-11	19.8941
ZBTB33	1.02289	4.9877	8.01286	2.41513e-13	1.06315e-11	19.882
KLHL15	0.93101	3.10977	8.01035	2.4504e-13	1.07592e-11	19.8679
FAF1	0.715286	5.16051	8.0083	2.47954e-13	1.08595e-11	19.8564
MCMBP	0.798618	5.71169	8.00701	2.49807e-13	1.09129e-11	19.8491
ADNP	0.874452	6.07619	8.00577	2.51595e-13	1.09632e-11	19.8422
PARG	0.825912	3.99978	8.0043	2.53735e-13	1.09745e-11	19.8339
POM121	1.06616	3.58618	8.00429	2.53746e-13	1.09745e-11	19.8339
SAP130	0.828291	4.98286	8.00428	2.53768e-13	1.09745e-11	19.8338
LSG1	0.773299	5.32574	8.00256	2.563e-13	1.10562e-11	19.8241
MGA	0.81322	3.45689	8.00155	2.57794e-13	1.10724e-11	19.8185
NCAPH	1.05762	3.91143	8.00143	2.57962e-13	1.10724e-11	19.8178
PRPF8	0.833843	6.6211	8.00084	2.58849e-13	1.10829e-11	19.8145
MIS18BP1	0.960787	4.03306	7.99823	2.62769e-13	1.12133e-11	19.7999
IPO8	0.919932	4.98988	7.99772	2.63542e-13	1.12133e-11	19.797
RBM41	0.805142	2.75098	7.9974	2.64029e-13	1.12133e-11	19.7952
SMG7	0.724225	5.85644	7.99709	2.64502e-13	1.12133e-11	19.7934
RECQL	1.33388	4.54264	7.99406	2.69161e-13	1.13828e-11	19.7764
ACAP2	0.927194	4.21289	7.993	2.70802e-13	1.14241e-11	19.7705
ESPL1	1.03886	3.36365	7.99145	2.73238e-13	1.14714e-11	19.7618
LRRC8B	1.00167	4.08562	7.99144	2.73256e-13	1.14714e-11	19.7617
GBP5	1.97842	3.8064	7.98718	2.80043e-13	1.17277e-11	19.7378
SPIRE1	1.22667	3.63552	7.98567	2.82487e-13	1.18014e-11	19.7293
G2E3	0.852618	3.11649	7.98482	2.83875e-13	1.18306e-11	19.7246
IQCB1	0.869969	5.1346	7.98181	2.88838e-13	1.20084e-11	19.7077
CRLF3	0.684945	3.83239	7.98077	2.90564e-13	1.20511e-11	19.7019
SUPT16H	0.785621	6.33364	7.98002	2.91837e-13	1.20748e-11	19.6976
EXOC8	0.812559	3.93853	7.97667	2.9752e-13	1.22689e-11	19.6788
DCLRE1A	0.912208	3.87339	7.97641	2.97955e-13	1.22689e-11	19.6774
RUBCN	0.945365	2.2959	7.97286	3.04113e-13	1.24926e-11	19.6575
ZNF510	0.812292	2.98702	7.96809	3.12575e-13	1.28096e-11	19.6307
DENND4C	1.18114	3.92078	7.96718	3.14211e-13	1.28461e-11	19.6256
LRPPRC	0.896502	6.29501	7.96586	3.16602e-13	1.29132e-11	19.6183
SMC6	0.78498	4.34337	7.96459	3.18935e-13	1.29775e-11	19.6111
CEP78	0.871607	2.97395	7.96308	3.21711e-13	1.30597e-11	19.6027
MELK	1.28894	5.30856	7.9588	3.29724e-13	1.33534e-11	19.5787
SP3	0.856622	4.51032	7.95795	3.31355e-13	1.3388e-11	19.5739
SMC1A	1.02245	5.60133	7.95601	3.35067e-13	1.35062e-11	19.563
PRELID3B	0.807288	6.86354	7.94924	3.48367e-13	1.40096e-11	19.5251
LRRCC1	1.31447	4.68323	7.94334	3.60377e-13	1.44588e-11	19.4921
BCLAF1	0.777937	5.59783	7.9423	3.62552e-13	1.45122e-11	19.4862
NUDT21	0.958932	6.05262	7.94024	3.66854e-13	1.46353e-11	19.4747
POT1	0.816483	3.52256	7.94002	3.67329e-13	1.46353e-11	19.4735
MTO1	0.585613	2.80604	7.93566	3.76645e-13	1.49719e-11	19.4491
ZNF813	0.85845	2.51313	7.93427	3.79651e-13	1.50566e-11	19.4413
PAQR3	0.813754	2.40079	7.93224	3.84106e-13	1.51982e-11	19.43
CEP55	1.22233	5.39385	7.93148	3.85788e-13	1.52298e-11	19.4257
RPA1	0.786285	6.21773	7.92951	3.90175e-13	1.53361e-11	19.4147
NEDD1	0.918052	4.31774	7.92947	3.90264e-13	1.53361e-11	19.4145
MDC1	1.07328	4.71348	7.92603	3.98054e-13	1.56066e-11	19.3952
CEP350	0.942362	4.24824	7.92281	4.05484e-13	1.58391e-11	19.3772
ATXN2L	0.725148	6.03585	7.92267	4.05823e-13	1.58391e-11	19.3764
ITCH	0.836494	4.41195	7.9188	4.14926e-13	1.61577e-11	19.3548
CEP97	0.87873	2.79579	7.91549	4.22892e-13	1.64308e-11	19.3362
HSPD1	0.800517	7.64844	7.90984	4.36833e-13	1.69342e-11	19.3046
MTF1	0.816243	3.7128	7.90454	4.50296e-13	1.74169e-11	19.2751
COPB1	0.7425	6.65884	7.90405	4.51576e-13	1.74272e-11	19.2723
ZFP91	0.814735	5.58131	7.9006	4.60612e-13	1.77361e-11	19.253
REST	0.85698	4.23936	7.89978	4.62764e-13	1.77792e-11	19.2485
AGTPBP1	1.05246	4.10496	7.89507	4.75432e-13	1.82252e-11	19.2222
HNRNPR	0.717928	6.09151	7.88802	4.95036e-13	1.89346e-11	19.1828
ZNF384	1.14298	3.92677	7.88394	5.06766e-13	1.93402e-11	19.16
GPBP1L1	0.682869	6.05055	7.87874	5.22072e-13	1.98803e-11	19.131
FBXL4	0.867195	3.63719	7.8776	5.25504e-13	1.99668e-11	19.1246
POLR1A	0.774198	4.42455	7.87639	5.29159e-13	2.00614e-11	19.1179
PRPF4	0.782586	5.19837	7.87231	5.41672e-13	2.04907e-11	19.0951
SDE2	0.904492	4.87007	7.86946	5.50572e-13	2.07817e-11	19.0792
NOP9	0.837027	3.88252	7.86725	5.57586e-13	2.10004e-11	19.0669
IPO9	0.820912	5.25157	7.86522	5.64107e-13	2.11996e-11	19.0556
GINS1	1.08165	4.49314	7.86474	5.65641e-13	2.12109e-11	19.0529
LARS1	0.69242	4.38579	7.85765	5.89068e-13	2.20414e-11	19.0134
RAD23B	0.775724	7.35048	7.85459	5.9949e-13	2.23827e-11	18.9963
TSR1	0.818939	4.91745	7.85151	6.10135e-13	2.27308e-11	18.9792
U2SURP	0.794484	5.20982	7.84934	6.17756e-13	2.2965e-11	18.9671
AMER1	0.965719	3.15633	7.84582	6.30331e-13	2.3382e-11	18.9475
BEND3	0.936832	3.00314	7.84166	6.45496e-13	2.38931e-11	18.9243
TTK	1.26948	4.53744	7.83887	6.55875e-13	2.42251e-11	18.9088
ZNF184	0.998886	4.01365	7.83699	6.6297e-13	2.44348e-11	18.8983
ZNF525	0.888578	2.71368	7.8316	6.8369e-13	2.51446e-11	18.8683
AIDA	0.894272	4.55842	7.82944	6.9219e-13	2.54029e-11	18.8563
SPAST	0.755989	3.69876	7.82615	7.05342e-13	2.58305e-11	18.8379
RESF1	1.01382	4.8202	7.82099	7.26447e-13	2.65469e-11	18.8092
ANKFY1	0.917598	3.72074	7.81896	7.34904e-13	2.67991e-11	18.798
PDS5A	0.875504	5.2363	7.81465	7.53211e-13	2.74086e-11	18.774
MICB	1.25027	3.29742	7.81013	7.72906e-13	2.8066e-11	18.7489
METTL4	0.869088	3.27428	7.80531	7.94438e-13	2.87871e-11	18.7221
SEH1L	0.882663	4.15848	7.80404	8.00219e-13	2.88805e-11	18.715
STK26	1.28501	5.08898	7.80401	8.00373e-13	2.88805e-11	18.7148
SETDB1	0.97049	4.27785	7.80287	8.05607e-13	2.90086e-11	18.7085
TCERG1	0.679208	4.52577	7.80247	8.07438e-13	2.90104e-11	18.7063
NAA50	0.840667	6.68444	7.80212	8.09028e-13	2.90104e-11	18.7044
RNF138	0.970526	4.8331	7.79661	8.34895e-13	2.98144e-11	18.6737
RNF168	0.981264	4.41728	7.7966	8.34913e-13	2.98144e-11	18.6737
GBP4	1.78595	4.74192	7.79375	8.48627e-13	3.02413e-11	18.6578
LARP4	0.811566	4.48668	7.79292	8.52629e-13	3.02831e-11	18.6532
OCRL	0.869655	4.95485	7.79278	8.53319e-13	3.02831e-11	18.6525
HAT1	0.735211	4.81027	7.79164	8.58913e-13	3.04189e-11	18.6461
ZBED4	0.86166	4.58945	7.78216	9.0658e-13	3.20412e-11	18.5935
FAM111B	1.36672	4.77372	7.77827	9.26935e-13	3.26934e-11	18.5719
TBL1XR1	0.844475	5.70554	7.77672	9.3515e-13	3.29157e-11	18.5633
SYNCRIP	0.86152	6.34816	7.77418	9.48764e-13	3.32892e-11	18.5492
KIF2A	0.782823	3.45898	7.77384	9.50622e-13	3.32892e-11	18.5473
KIF20A	1.17002	5.39149	7.77366	9.51562e-13	3.32892e-11	18.5463
APPL1	0.818305	4.84132	7.77084	9.66968e-13	3.37595e-11	18.5307
CDC6	1.01471	4.27474	7.75772	1.04199e-12	3.63051e-11	18.4579
NEK2	1.25331	5.17512	7.75685	1.04714e-12	3.64109e-11	18.4531
ATF6	0.850375	5.34587	7.75152	1.07942e-12	3.74533e-11	18.4236
WDR76	1.00494	3.82695	7.75119	1.08147e-12	3.74533e-11	18.4217
PPIG	0.731297	4.76786	7.74597	1.11407e-12	3.84641e-11	18.3928
DNAJC14	0.95496	3.44608	7.74556	1.11667e-12	3.84641e-11	18.3905
TUBA1B	0.907588	6.9381	7.74545	1.11736e-12	3.84641e-11	18.3899
WBP11	0.837743	6.31356	7.74276	1.13458e-12	3.89788e-11	18.375
TRAPPC10	0.986553	3.15316	7.74129	1.14411e-12	3.92278e-11	18.3669
PAXIP1	0.806337	2.82019	7.74025	1.15087e-12	3.93813e-11	18.3612
MAD2L1	1.11557	4.4237	7.73904	1.15886e-12	3.9576e-11	18.3544
CNOT4	0.603154	3.80387	7.7357	1.18105e-12	4.02539e-11	18.3359
CDC23	0.709015	4.74538	7.73489	1.18653e-12	4.02741e-11	18.3314
COX4I2	-1.02273	2.66346	-7.73461	1.18843e-12	4.02741e-11	18.3299
CCNE2	1.30552	2.54175	7.73457	1.18866e-12	4.02741e-11	18.3297
NDE1	0.843613	3.89287	7.73367	1.19476e-12	4.04013e-11	18.3247
UBE2E1	0.803239	4.42167	7.73072	1.21499e-12	4.10048e-11	18.3084
CHEK1	1.05337	4.34574	7.73027	1.21807e-12	4.10283e-11	18.3059
PIK3CB	0.903363	4.62045	7.72985	1.22098e-12	4.10458e-11	18.3036
SMCR8	0.994548	3.96712	7.72949	1.22352e-12	4.10512e-11	18.3015
KHDRBS1	0.581719	7.68459	7.7256	1.25084e-12	4.1886e-11	18.28
ZNF765	0.710734	2.18782	7.72457	1.25817e-12	4.20499e-11	18.2744
USO1	0.860682	6.23605	7.72422	1.26071e-12	4.20529e-11	18.2724
CDCA8	1.17734	5.93577	7.72356	1.26539e-12	4.21276e-11	18.2688
NPAT	0.920982	3.48604	7.72192	1.2773e-12	4.24418e-11	18.2597
WDR7	0.772473	3.10039	7.71959	1.29433e-12	4.29247e-11	18.2468
CHAMP1	1.10329	4.28945	7.71747	1.30995e-12	4.33594e-11	18.2351
STK4	0.761952	4.42092	7.71466	1.33108e-12	4.39743e-11	18.2195
RBBP8	1.13572	4.96088	7.70754	1.38597e-12	4.56998e-11	18.1802
ZNF146	0.985492	6.96013	7.70426	1.41202e-12	4.63831e-11	18.162
DCAF10	0.812487	4.57772	7.70425	1.41208e-12	4.63831e-11	18.162
ZNF627	0.849866	4.24924	7.70385	1.41533e-12	4.64012e-11	18.1598
TAF4B	1.18063	3.57969	7.70255	1.42576e-12	4.66545e-11	18.1526
SMARCC1	1.02768	6.45765	7.69893	1.45537e-12	4.75327e-11	18.1326
SPRTN	0.74214	3.52502	7.69786	1.46419e-12	4.76756e-11	18.1267
KPNA4	0.697218	5.11966	7.69773	1.46529e-12	4.76756e-11	18.126
RMC1	0.67963	4.35838	7.6974	1.46805e-12	4.76756e-11	18.1241
CWC22	0.662911	5.06849	7.69124	1.52025e-12	4.92779e-11	18.0901
POU2F1	0.706756	3.13629	7.68854	1.54371e-12	4.99442e-11	18.0752
TSTD2	1.01084	2.5941	7.68782	1.55008e-12	5.00562e-11	18.0712
ZNF280C	0.796243	2.67875	7.68718	1.55566e-12	5.01371e-11	18.0677
DNAJA1	0.762164	8.31783	7.68687	1.55841e-12	5.01371e-11	18.066
DLGAP5	1.11507	4.81431	7.68328	1.5905e-12	5.10161e-11	18.0461
SENP2	0.814083	4.43261	7.68315	1.59166e-12	5.10161e-11	18.0454
USP37	1.19813	2.27586	7.68276	1.59513e-12	5.10323e-11	18.0433
EMSY	0.848856	3.11532	7.68043	1.6164e-12	5.16167e-11	18.0304
APAF1	1.01402	3.01878	7.67871	1.63218e-12	5.20242e-11	18.021
TAF1	0.888005	3.99294	7.67744	1.64399e-12	5.23037e-11	18.0139
ZNF669	0.955964	3.67878	7.67391	1.67725e-12	5.32634e-11	17.9944
BARD1	0.987502	3.26646	7.66984	1.71633e-12	5.44042e-11	17.972
HELLS	0.963977	3.00044	7.66649	1.74924e-12	5.53455e-11	17.9535
SLC30A6	0.762644	4.89149	7.66146	1.79974e-12	5.68389e-11	17.9258
DTL	1.12075	4.52443	7.65739	1.84167e-12	5.80565e-11	17.9034
BTN2A2	0.953017	3.42932	7.65389	1.87862e-12	5.91129e-11	17.8841
GNA13	0.863992	5.64665	7.65075	1.91226e-12	6.00616e-11	17.8668
PBRM1	0.949478	4.50984	7.64718	1.9513e-12	6.11762e-11	17.8471
RAB3GAP2	0.848673	4.34845	7.64421	1.98438e-12	6.21003e-11	17.8307
CNOT6	0.83922	4.91392	7.64375	1.9895e-12	6.21474e-11	17.8282
ZNF317	0.734611	4.66076	7.64116	2.01891e-12	6.29519e-11	17.8139
ABCB10	0.865892	4.42812	7.63856	2.04881e-12	6.37687e-11	17.7996
DHX8	0.699381	4.40496	7.63792	2.05618e-12	6.38825e-11	17.7961
TRMT11	0.841644	3.34385	7.6373	2.06342e-12	6.3992e-11	17.7927
NCK1	0.84807	4.47346	7.63428	2.099e-12	6.49783e-11	17.7761
TAB2	0.830869	5.91855	7.63347	2.10865e-12	6.50822e-11	17.7716
CDC42SE2	0.759412	5.15624	7.63336	2.10992e-12	6.50822e-11	17.771
ZFP69B	0.893583	2.56928	7.63272	2.11756e-12	6.52012e-11	17.7675
SETX	0.927393	4.60855	7.63009	2.14934e-12	6.59045e-11	17.753
BIRC6	0.925987	4.40849	7.6299	2.15159e-12	6.59045e-11	17.752
SPIN1	0.897578	6.29837	7.62988	2.15189e-12	6.59045e-11	17.7519
PARP14	1.26395	5.30157	7.62419	2.22211e-12	6.79343e-11	17.7206
WDR43	0.759904	5.89974	7.6226	2.2422e-12	6.84269e-11	17.7118
TGS1	0.851246	4.9077	7.61441	2.34835e-12	7.15396e-11	17.6668
AGO1	0.789751	4.13957	7.61331	2.36305e-12	7.18601e-11	17.6607
USP34	1.33816	3.94148	7.61139	2.38877e-12	7.25141e-11	17.6502
WASHC5	0.944625	5.63717	7.60996	2.40818e-12	7.29745e-11	17.6423
FAM217B	0.805514	3.76467	7.60859	2.42689e-12	7.34123e-11	17.6348
ZNF148	0.819767	4.20582	7.60688	2.45042e-12	7.3994e-11	17.6254
UBE4A	1.32528	3.97554	7.60479	2.47941e-12	7.47384e-11	17.6139
ZFR	0.955054	5.92317	7.60307	2.5037e-12	7.53387e-11	17.6045
KDM5A	1.02672	4.72882	7.6024	2.51321e-12	7.53994e-11	17.6008
MRPS22	0.60128	3.88555	7.60231	2.51448e-12	7.53994e-11	17.6003
CTDSPL2	0.809542	3.77352	7.60065	2.53803e-12	7.59731e-11	17.5912
RO60	0.972729	4.20204	7.59905	2.56105e-12	7.65291e-11	17.5824
ME2	0.882756	3.66745	7.59819	2.57358e-12	7.67702e-11	17.5777
ZNF322	0.857218	2.34579	7.59372	2.6393e-12	7.85946e-11	17.5531
NEMF	0.896573	3.47968	7.59037	2.68959e-12	7.98631e-11	17.5347
YY1AP1	0.842244	5.23228	7.59027	2.69118e-12	7.98631e-11	17.5342
EML4	0.801016	5.33242	7.58572	2.76104e-12	8.14938e-11	17.5092
STX17	0.731227	3.9391	7.58557	2.76349e-12	8.14938e-11	17.5084
TAF1A	0.863963	3.02836	7.58548	2.76489e-12	8.14938e-11	17.5079
BRCA2	0.961688	2.29315	7.58547	2.76507e-12	8.14938e-11	17.5078
CENPL	0.824317	3.5925	7.58484	2.77477e-12	8.16398e-11	17.5044
PTPRK	1.09189	5.81529	7.58356	2.7949e-12	8.2092e-11	17.4974
PRR14L	0.893949	4.10803	7.58146	2.82817e-12	8.29275e-11	17.4858
TEX10	0.773171	4.1239	7.58088	2.83742e-12	8.30573e-11	17.4827
GEMIN5	0.725457	4.2855	7.57921	2.86436e-12	8.37035e-11	17.4735
G3BP2	0.923451	5.10808	7.57879	2.8711e-12	8.37582e-11	17.4712
SF3B1	0.7562	6.74048	7.57658	2.90704e-12	8.46634e-11	17.4591
NUP214	0.576701	4.25962	7.57564	2.9225e-12	8.49698e-11	17.4539
CSE1L	0.81274	7.32692	7.5736	2.95629e-12	8.58071e-11	17.4427
PAICS	0.920295	6.51596	7.57208	2.98178e-12	8.64015e-11	17.4344
MANEA	0.949833	3.64561	7.56972	3.02174e-12	8.74121e-11	17.4214
RALGAPB	0.827578	4.59522	7.56899	3.03416e-12	8.75717e-11	17.4174
CTPS1	0.947992	4.35089	7.5688	3.03743e-12	8.75717e-11	17.4164
STAT3	0.88656	6.47426	7.56427	3.11583e-12	8.96818e-11	17.3916
CCDC117	0.786229	5.19063	7.56282	3.14148e-12	9.02692e-11	17.3836
NUP58	0.921518	4.22915	7.56143	3.16608e-12	9.08244e-11	17.376
PPP4R3B	0.78649	5.89236	7.56074	3.17844e-12	9.10272e-11	17.3722
WARS1	1.20982	6.60973	7.55932	3.20392e-12	9.16043e-11	17.3644
ZNF143	0.567234	3.85359	7.55826	3.22319e-12	9.17341e-11	17.3586
ZMYM1	0.781832	3.27663	7.55824	3.22353e-12	9.17341e-11	17.3585
ZNF618	0.900221	3.80976	7.55819	3.22444e-12	9.17341e-11	17.3582
ESF1	0.848093	4.75847	7.55614	3.26189e-12	9.26462e-11	17.347
CDK2	0.822389	4.91357	7.55533	3.27673e-12	9.29146e-11	17.3426
MDN1	0.998858	3.87847	7.55427	3.29633e-12	9.33166e-11	17.3368
PRMT3	0.803681	3.61242	7.55237	3.33181e-12	9.4166e-11	17.3263
PRRC2B	1.18955	5.2635	7.5518	3.34248e-12	9.43129e-11	17.3232
SEC24C	1.18064	4.71921	7.55055	3.36607e-12	9.48229e-11	17.3164
PSMD12	0.694644	5.8067	7.5502	3.37276e-12	9.48561e-11	17.3145
ZBTB5	0.876212	4.4883	7.54353	3.50163e-12	9.83199e-11	17.278
ZNF468	0.872667	3.65786	7.54108	3.55019e-12	9.95209e-11	17.2646
AURKA	1.00485	5.39352	7.53936	3.58468e-12	1.00324e-10	17.2552
CTR9	0.746869	5.12246	7.53837	3.60474e-12	1.00722e-10	17.2497
E2F7	1.23657	2.29039	7.53746	3.62325e-12	1.01075e-10	17.2447
USP18	1.21321	4.62337	7.53339	3.70714e-12	1.03248e-10	17.2225
CBL	0.863845	3.7879	7.53221	3.73189e-12	1.03769e-10	17.216
TASOR	0.77575	4.56534	7.53192	3.738e-12	1.03772e-10	17.2144
NARS1	0.784536	7.13073	7.52712	3.84018e-12	1.0641e-10	17.1882
CAPN7	0.856009	4.4227	7.52688	3.84539e-12	1.0641e-10	17.1868
SPEN	0.88985	4.57131	7.52647	3.85408e-12	1.06479e-10	17.1846
CDCA2	1.29562	4.24326	7.52221	3.9475e-12	1.08885e-10	17.1613
CSTF1	0.559237	4.89115	7.51993	3.99839e-12	1.10031e-10	17.1489
GPATCH8	0.825728	4.26219	7.51978	4.00181e-12	1.10031e-10	17.148
UBA6	0.82283	4.1831	7.51899	4.0197e-12	1.10346e-10	17.1437
MCM8	0.673475	2.3116	7.51862	4.02791e-12	1.10396e-10	17.1417
GON4L	0.835648	4.08781	7.51734	4.05711e-12	1.11019e-10	17.1347
GTF2H3	0.736776	4.6206	7.51693	4.06627e-12	1.11093e-10	17.1325
PSMD1	0.636654	4.93278	7.51259	4.16679e-12	1.13659e-10	17.1087
PPP1R8	0.59114	6.02976	7.51207	4.17892e-12	1.13809e-10	17.1059
EIF2AK2	1.01526	5.17418	7.508	4.27545e-12	1.16254e-10	17.0837
HSPB1	-1.42096	8.78451	-7.50562	4.33305e-12	1.17635e-10	17.0706
TMEM182	0.697048	2.15288	7.50442	4.36213e-12	1.18238e-10	17.0641
PRKRA	0.72721	3.15676	7.50389	4.37511e-12	1.18403e-10	17.0612
TRIM44	0.888605	4.98489	7.50345	4.38594e-12	1.1851e-10	17.0588
SENP5	0.779148	4.56111	7.50247	4.41035e-12	1.18983e-10	17.0534
RPAP3	0.665853	4.40616	7.50106	4.44534e-12	1.19739e-10	17.0457
MRE11	0.757132	3.98105	7.49844	4.51105e-12	1.21249e-10	17.0315
APOL6	1.27647	5.17968	7.49827	4.51548e-12	1.21249e-10	17.0305
TRIM25	0.833956	4.30622	7.49793	4.5239e-12	1.21286e-10	17.0287
RPRD2	0.850657	5.1307	7.49457	4.61005e-12	1.23403e-10	17.0103
FAM53C	0.759153	4.40465	7.49251	4.6637e-12	1.24645e-10	16.9991
NUDCD1	0.892251	3.9161	7.4918	4.68229e-12	1.24948e-10	16.9952
ETF1	0.664645	6.64186	7.48685	4.81415e-12	1.28268e-10	16.9682
INIP	0.773263	4.687	7.48622	4.83112e-12	1.28521e-10	16.9648
BAZ2A	0.865255	4.90543	7.4831	4.91643e-12	1.30589e-10	16.9477
PSME4	0.893933	6.11856	7.48248	4.93354e-12	1.30841e-10	16.9444
ACTL6A	0.91471	5.99299	7.48164	4.95664e-12	1.31252e-10	16.9398
LRRC58	0.839431	4.88246	7.48025	4.99558e-12	1.3208e-10	16.9322
PTER	0.972052	4.11594	7.47362	5.1845e-12	1.36865e-10	16.8961
SDAD1	0.74228	5.76277	7.47285	5.20685e-12	1.37244e-10	16.8919
NOLC1	0.798403	7.12889	7.46842	5.3377e-12	1.40478e-10	16.8677
MTOR	0.791451	4.49965	7.46339	5.49037e-12	1.44275e-10	16.8403
ATP11B	0.979895	4.59386	7.46307	5.50018e-12	1.44313e-10	16.8386
UBQLN4	0.874286	6.42209	7.46113	5.56006e-12	1.45662e-10	16.828
RAD21	1.12163	7.85797	7.45821	5.65176e-12	1.47839e-10	16.8121
UBP1	0.761524	5.14164	7.4572	5.68381e-12	1.48452e-10	16.8066
PI4K2B	0.828962	5.09773	7.45657	5.70379e-12	1.48748e-10	16.8032
PSIP1	1.14388	5.25616	7.45609	5.71931e-12	1.48927e-10	16.8006
ATXN7	0.689389	2.94816	7.45058	5.89843e-12	1.53214e-10	16.7706
STAM	0.784329	4.72333	7.45048	5.90174e-12	1.53214e-10	16.77
LAP3	0.933673	6.89816	7.44932	5.9402e-12	1.5398e-10	16.7637
SLC25A44	0.674598	4.72644	7.44821	5.97703e-12	1.54702e-10	16.7577
TRIP12	0.811659	5.68391	7.44737	6.0051e-12	1.55195e-10	16.7531
FAM72A	0.782724	1.59697	7.44672	6.02705e-12	1.55529e-10	16.7496
GCC1	0.6939	4.6614	7.44538	6.07237e-12	1.56463e-10	16.7423
DNAJC9	0.803783	4.07327	7.44486	6.09019e-12	1.56688e-10	16.7394
VIRMA	0.8024	5.07216	7.44196	6.18977e-12	1.59013e-10	16.7237
NEIL3	0.981453	2.7376	7.44115	6.21769e-12	1.59492e-10	16.7193
FUBP1	0.789074	5.74116	7.44001	6.25739e-12	1.60271e-10	16.7131
CENPQ	0.855647	4.05921	7.43846	6.31211e-12	1.61395e-10	16.7046
ZNF670	0.840181	2.9206	7.43823	6.32002e-12	1.61395e-10	16.7034
FOXN2	0.822146	3.86621	7.43655	6.37973e-12	1.62678e-10	16.6942
KLF11	1.05693	4.44041	7.43557	6.41492e-12	1.63334e-10	16.6889
YEATS2	0.88617	4.59493	7.43082	6.58754e-12	1.67481e-10	16.6631
SCYL2	0.865916	4.94335	7.43041	6.60261e-12	1.67617e-10	16.6608
USP16	0.759189	4.98911	7.42907	6.65219e-12	1.68627e-10	16.6536
NAA25	0.780774	3.67365	7.42822	6.68369e-12	1.69002e-10	16.649
DCAF17	0.742846	3.32964	7.42814	6.68664e-12	1.69002e-10	16.6485
KIF23	1.11915	4.45586	7.42709	6.72611e-12	1.69751e-10	16.6428
VCPIP1	0.857338	4.03016	7.42549	6.78645e-12	1.71023e-10	16.6341
RABAC1	-0.841455	3.87103	-7.42341	6.86591e-12	1.72772e-10	16.6228
LRRC42	0.767948	6.09909	7.42211	6.91566e-12	1.7377e-10	16.6158
SRSF1	0.667629	5.45414	7.41986	7.00315e-12	1.75399e-10	16.6035
POLE3	0.768563	6.74005	7.41974	7.00778e-12	1.75399e-10	16.6029
HELB	0.72902	1.68039	7.41966	7.01108e-12	1.75399e-10	16.6024
CDC27	0.713271	5.04031	7.41775	7.08641e-12	1.77026e-10	16.5921
RBM12B	0.826543	3.22794	7.4137	7.24825e-12	1.80807e-10	16.5701
FPR3	1.3068	5.27445	7.41245	7.29919e-12	1.81814e-10	16.5633
ELP1	0.747692	2.8962	7.41149	7.33827e-12	1.82524e-10	16.5581
SMG8	0.962423	4.11285	7.40748	7.50426e-12	1.86383e-10	16.5363
PRKCI	0.917462	5.17476	7.40687	7.53013e-12	1.86756e-10	16.533
AZI2	0.667462	3.20534	7.40656	7.54289e-12	1.86803e-10	16.5313
SSX2IP	0.94958	3.94238	7.40314	7.68823e-12	1.90116e-10	16.5128
SF3A1	0.726571	6.18773	7.4029	7.69873e-12	1.90116e-10	16.5114
ARID1A	0.831077	4.8191	7.4023	7.72428e-12	1.90445e-10	16.5082
OAS3	1.38218	5.45505	7.40202	7.73657e-12	1.90445e-10	16.5067
SP1	0.700505	5.67498	7.40182	7.74528e-12	1.90445e-10	16.5056
TNPO3	0.727677	6.02865	7.40103	7.77931e-12	1.90972e-10	16.5013
PARS2	0.676578	3.85281	7.40081	7.7889e-12	1.90972e-10	16.5001
UBA2	0.887655	6.67166	7.39918	7.86006e-12	1.92443e-10	16.4913
SPAG5	0.965688	4.54984	7.39489	8.05042e-12	1.96824e-10	16.468
ENOX2	0.753831	4.06615	7.39455	8.06555e-12	1.96914e-10	16.4662
UBR4	0.981389	4.5423	7.39278	8.14561e-12	1.98587e-10	16.4565
TXNRD1	0.874956	5.63754	7.39081	8.23547e-12	2.00494e-10	16.4459
CLASP1	0.770388	4.42676	7.38856	8.33959e-12	2.02741e-10	16.4337
FANCB	0.770774	2.03417	7.38748	8.38962e-12	2.0367e-10	16.4278
PAIP2	0.616733	5.15947	7.38498	8.50752e-12	2.06241e-10	16.4143
PUM1	0.772581	5.86664	7.37931	8.78069e-12	2.12564e-10	16.3835
KBTBD4	0.749465	2.60266	7.37768	8.86073e-12	2.14201e-10	16.3747
PLAGL2	0.878372	4.44889	7.37583	8.9524e-12	2.16113e-10	16.3647
GPR180	0.991046	3.55664	7.37509	8.98921e-12	2.16514e-10	16.3607
SMARCC2	0.808052	4.71809	7.37499	8.99414e-12	2.16514e-10	16.3602
PCNA	0.811456	8.50412	7.37401	9.04358e-12	2.174e-10	16.3548
DHTKD1	1.12007	5.95654	7.37297	9.09606e-12	2.18356e-10	16.3492
NFXL1	0.751255	3.38837	7.37234	9.12797e-12	2.18817e-10	16.3458
CHCHD3	0.706082	5.92997	7.36903	9.2981e-12	2.22585e-10	16.3278
RBBP6	0.675838	4.76652	7.3663	9.44024e-12	2.25674e-10	16.3131
GDAP2	0.679942	3.01556	7.36523	9.49664e-12	2.26708e-10	16.3073
PRDM4	0.658083	4.62273	7.36402	9.56101e-12	2.27928e-10	16.3007
UHMK1	0.90178	5.86599	7.36122	9.71075e-12	2.31178e-10	16.2856
TCF19	1.1203	5.55153	7.3608	9.73388e-12	2.3134e-10	16.2833
TRMT61B	0.768888	4.00195	7.3606	9.74444e-12	2.3134e-10	16.2822
CUL3	0.816239	4.08807	7.36005	9.7743e-12	2.31729e-10	16.2793
SELENOI	0.862499	4.86289	7.35969	9.79407e-12	2.31878e-10	16.2773
POLR2D	0.702517	4.79712	7.35884	9.84015e-12	2.32649e-10	16.2727
TRUB1	0.864979	4.49234	7.35729	9.92585e-12	2.34227e-10	16.2643
HAUS2	0.751241	3.97995	7.35714	9.93409e-12	2.34227e-10	16.2635
ASH1L	1.06767	4.69336	7.35648	9.9702e-12	2.34757e-10	16.26
AGO4	0.811046	3.97215	7.35177	1.02349e-11	2.4066e-10	16.2345
GTSE1	1.0559	4.23524	7.35019	1.03254e-11	2.42457e-10	16.2259
ACTR2	0.734505	8.17139	7.3476	1.04752e-11	2.4564e-10	16.2119
HPS5	0.796867	4.21556	7.34527	1.06119e-11	2.48507e-10	16.1993
SRPK2	0.793082	4.97925	7.34454	1.0655e-11	2.49177e-10	16.1953
ATP2C1	0.839539	6.07004	7.3425	1.07764e-11	2.51673e-10	16.1843
HELZ	0.860018	3.7837	7.34149	1.08368e-11	2.52741e-10	16.1789
COMMD2	0.84233	5.1754	7.33608	1.11679e-11	2.60111e-10	16.1496
KIF1B	0.931684	4.08564	7.33231	1.14038e-11	2.65247e-10	16.1293
PNPT1	0.794066	5.05641	7.3265	1.17782e-11	2.73367e-10	16.0979
KAT7	0.728197	3.90781	7.3264	1.17847e-11	2.73367e-10	16.0973
SRFBP1	0.771868	3.61937	7.32522	1.18618e-11	2.74785e-10	16.091
ZNF106	0.953917	4.14963	7.32365	1.19656e-11	2.76817e-10	16.0825
LMTK2	0.778303	3.7795	7.32189	1.20837e-11	2.79174e-10	16.073
FOXJ3	0.788175	5.15381	7.32071	1.21625e-11	2.80618e-10	16.0667
ATG5	0.659709	4.88544	7.32022	1.21962e-11	2.81018e-10	16.064
ATP6V0A2	0.667027	2.63868	7.3197	1.22314e-11	2.81453e-10	16.0612
TUBA1C	0.814438	6.12005	7.3192	1.22654e-11	2.81859e-10	16.0585
RFX5	0.913347	5.57368	7.31818	1.23346e-11	2.83071e-10	16.053
RBSN	0.799375	3.93136	7.31759	1.23754e-11	2.83287e-10	16.0498
AVL9	0.800825	3.87081	7.31757	1.23769e-11	2.83287e-10	16.0497
KANSL2	0.614877	4.78799	7.31632	1.24626e-11	2.84868e-10	16.043
CBX5	1.02435	5.03006	7.31197	1.27669e-11	2.91438e-10	16.0195
MTHFD2	0.868186	4.92542	7.31147	1.28026e-11	2.91866e-10	16.0168
MTHFD1	0.742471	4.18226	7.31102	1.28349e-11	2.91874e-10	16.0143
NOP58	0.71245	6.27914	7.31099	1.28369e-11	2.91874e-10	16.0142
SLC25A40	0.749581	3.74322	7.30877	1.29957e-11	2.95095e-10	16.0022
SKA1	1.08768	4.09872	7.30852	1.30136e-11	2.95113e-10	16.0009
FMNL2	1.01744	4.72227	7.30743	1.30928e-11	2.96517e-10	15.995
WAPL	0.776965	5.05035	7.30619	1.31835e-11	2.98067e-10	15.9883
ORC3	0.836461	5.1546	7.30602	1.31959e-11	2.98067e-10	15.9874
SRSF10	0.62541	5.01382	7.30447	1.33091e-11	3.00232e-10	15.979
ZNF562	0.773507	3.33316	7.30213	1.34836e-11	3.03769e-10	15.9664
TAOK3	0.709929	3.99863	7.30028	1.36221e-11	3.06489e-10	15.9564
GOSR1	0.624888	4.1869	7.29719	1.38574e-11	3.11319e-10	15.9398
NMD3	0.708938	5.50366	7.29699	1.3873e-11	3.11319e-10	15.9387
FBXW11	0.757015	4.87269	7.29663	1.39003e-11	3.11525e-10	15.9368
SIKE1	0.789133	4.84156	7.29514	1.40161e-11	3.13712e-10	15.9287
HNRNPC	0.464599	7.73192	7.29316	1.41702e-11	3.16749e-10	15.9181
ZW10	0.818731	5.15218	7.29244	1.42275e-11	3.17619e-10	15.9142
RANBP2	0.881005	5.33107	7.29186	1.42727e-11	3.18215e-10	15.9111
ARL6IP1	0.753761	7.94841	7.28845	1.45449e-11	3.23865e-10	15.8927
DDX59	0.707006	4.25246	7.2869	1.46704e-11	3.26236e-10	15.8844
HINT3	0.960277	5.52502	7.28573	1.47659e-11	3.27937e-10	15.878
C4orf46	0.788423	3.84507	7.28396	1.49115e-11	3.30131e-10	15.8685
CHD1	0.758207	3.8114	7.28394	1.49131e-11	3.30131e-10	15.8684
PITPNB	0.689619	5.77719	7.28383	1.49223e-11	3.30131e-10	15.8678
CNOT10	0.608523	4.67186	7.28282	1.50055e-11	3.31546e-10	15.8624
CARM1	0.799372	5.35128	7.28145	1.51203e-11	3.33654e-10	15.855
C17orf80	0.793519	4.05777	7.28118	1.51428e-11	3.33724e-10	15.8535
YME1L1	0.7796	6.60584	7.28078	1.51759e-11	3.34025e-10	15.8514
TNPO1	0.765868	4.94467	7.27973	1.52649e-11	3.35536e-10	15.8457
SCLT1	0.59523	2.60661	7.27951	1.52836e-11	3.35536e-10	15.8445
CDC5L	0.847007	5.57315	7.27863	1.53581e-11	3.36743e-10	15.8398
ACTR3	0.673996	6.32175	7.27778	1.54307e-11	3.37906e-10	15.8352
STRN	0.804978	4.01809	7.27728	1.54728e-11	3.38396e-10	15.8326
DCP1A	0.723654	4.0856	7.27006	1.61038e-11	3.5175e-10	15.7937
ZNF543	0.739185	2.71845	7.26749	1.63343e-11	3.56333e-10	15.7799
THAP12	0.802896	4.68864	7.26665	1.64108e-11	3.57548e-10	15.7753
TSN	0.700852	6.4402	7.26515	1.65474e-11	3.60069e-10	15.7673
TMEM209	0.776152	4.49153	7.26227	1.68129e-11	3.65383e-10	15.7518
RBL1	0.968613	3.88263	7.26056	1.6973e-11	3.68116e-10	15.7426
PSME3	0.664837	6.30179	7.26047	1.69814e-11	3.68116e-10	15.7421
JAK2	0.920718	3.41457	7.25974	1.70496e-11	3.6896e-10	15.7382
TBCCD1	0.83638	3.85756	7.25952	1.70709e-11	3.6896e-10	15.737
GATAD2B	0.874952	4.80991	7.25937	1.70847e-11	3.6896e-10	15.7362
IARS2	0.811309	7.06104	7.25877	1.71418e-11	3.69729e-10	15.733
ARL14EP	0.676321	4.10903	7.25854	1.71632e-11	3.69729e-10	15.7318
PUS7L	0.726019	2.64567	7.25702	1.73084e-11	3.7239e-10	15.7236
DR1	0.693182	4.56323	7.25576	1.74293e-11	3.74522e-10	15.7168
GMCL1	0.733262	4.62576	7.25519	1.74838e-11	3.75225e-10	15.7138
CRKL	0.778074	5.94393	7.25446	1.75549e-11	3.76283e-10	15.7098
PRRC2C	0.886659	6.14127	7.25388	1.76111e-11	3.77017e-10	15.7067
PRPF38A	0.639315	5.39495	7.25313	1.76841e-11	3.78111e-10	15.7027
UTP18	0.713515	5.73205	7.24977	1.80162e-11	3.84734e-10	15.6846
POLR2A	0.768374	6.43507	7.24755	1.82386e-11	3.88999e-10	15.6727
DNAJC13	0.781791	4.65499	7.24441	1.85568e-11	3.95297e-10	15.6559
CEP70	0.834128	4.42005	7.24167	1.88402e-11	4.00813e-10	15.6411
INTS2	0.875453	2.84616	7.24146	1.88623e-11	4.00813e-10	15.64
ZBTB43	0.706821	3.26016	7.24085	1.89261e-11	4.01672e-10	15.6367
PDCD1LG2	1.0445	3.06991	7.24034	1.89788e-11	4.0211e-10	15.634
PBK	1.1563	4.91455	7.2402	1.89935e-11	4.0211e-10	15.6332
TFAM	0.86383	5.10691	7.23961	1.90561e-11	4.0294e-10	15.63
ARL6IP6	0.931181	4.06744	7.23811	1.92143e-11	4.05787e-10	15.622
FUBP3	0.746925	4.75836	7.23773	1.92549e-11	4.06147e-10	15.62
OXSR1	0.727938	5.14058	7.23475	1.95741e-11	4.12375e-10	15.604
C2CD3	0.785018	3.45467	7.23446	1.96055e-11	4.12479e-10	15.6024
NT5C2	1.07287	3.60855	7.23416	1.9638e-11	4.12479e-10	15.6008
ARID2	0.850561	3.35566	7.23404	1.9651e-11	4.12479e-10	15.6002
C18orf54	0.844092	2.31535	7.23371	1.96864e-11	4.1272e-10	15.5984
ITPR3	1.38735	5.08601	7.23179	1.98967e-11	4.16621e-10	15.5881
SUV39H2	0.90199	4.24869	7.23017	2.00754e-11	4.19852e-10	15.5794
THUMPD3	0.684817	4.5665	7.22711	2.04172e-11	4.26482e-10	15.563
HNRNPA2B1	0.498817	7.76539	7.22615	2.05253e-11	4.27955e-10	15.5578
CDC25A	1.00259	3.76076	7.22604	2.05375e-11	4.27955e-10	15.5573
ZBTB11	0.743752	3.83893	7.22553	2.05962e-11	4.28661e-10	15.5545
ZNF567	0.850495	2.93447	7.225	2.06563e-11	4.29392e-10	15.5517
GNPNAT1	0.852094	4.16871	7.22212	2.09872e-11	4.35335e-10	15.5362
UHRF1BP1L	0.826973	3.57607	7.22198	2.10029e-11	4.35335e-10	15.5355
ARMC8	0.639306	3.91743	7.22185	2.10181e-11	4.35335e-10	15.5348
ZNF473	0.680968	3.08501	7.22054	2.11705e-11	4.37964e-10	15.5278
TRA2B	0.571667	5.29179	7.2201	2.1222e-11	4.38504e-10	15.5254
SERBP1	0.658528	7.47341	7.21939	2.13055e-11	4.397e-10	15.5216
PHACTR4	0.784356	4.92385	7.21876	2.13797e-11	4.40704e-10	15.5182
C6orf62	0.722958	8.0126	7.21708	2.15788e-11	4.44276e-10	15.5092
MIB1	0.983589	4.67141	7.21154	2.22481e-11	4.57509e-10	15.4795
GTF3C3	0.764536	4.24173	7.21099	2.23153e-11	4.58342e-10	15.4766
CDCA5	1.06024	5.36237	7.2095	2.24987e-11	4.61543e-10	15.4686
ECPAS	0.744779	5.89523	7.2091	2.25491e-11	4.61543e-10	15.4664
CHML	1.31731	4.32025	7.20881	2.25846e-11	4.61543e-10	15.4649
SKP2	0.960306	3.12976	7.20868	2.26007e-11	4.61543e-10	15.4642
MCM3AP	1.01465	4.07947	7.20865	2.26052e-11	4.61543e-10	15.464
TUBGCP4	0.642841	2.28941	7.20785	2.27046e-11	4.63024e-10	15.4597
XPO4	0.811676	3.60325	7.20601	2.29356e-11	4.66516e-10	15.4499
SHLD2	0.746566	4.58545	7.2059	2.29495e-11	4.66516e-10	15.4493
YTHDF2	0.603902	6.58977	7.20584	2.29572e-11	4.66516e-10	15.449
CMPK2	1.38749	3.90486	7.20484	2.30841e-11	4.68542e-10	15.4436
SBNO1	0.831733	4.38883	7.20337	2.32725e-11	4.7181e-10	15.4357
WNK1	1.08125	5.71222	7.20298	2.33217e-11	4.72251e-10	15.4337
XPO7	0.807443	5.51508	7.20155	2.35064e-11	4.75432e-10	15.426
NSRP1	0.589179	4.58482	7.20077	2.36081e-11	4.76928e-10	15.4218
SNX4	0.662335	5.74309	7.19897	2.38434e-11	4.81117e-10	15.4122
NUFIP2	0.741868	5.19973	7.19323	2.46082e-11	4.9581e-10	15.3815
TBC1D5	0.8581	4.21382	7.19308	2.46292e-11	4.9581e-10	15.3807
NEPRO	0.646544	4.72061	7.19266	2.46863e-11	4.9618e-10	15.3784
TPP2	0.823581	4.51994	7.19252	2.47052e-11	4.9618e-10	15.3777
KLHL12	0.717448	5.55276	7.19138	2.48605e-11	4.98717e-10	15.3716
ABCE1	0.75448	5.43673	7.1905	2.49816e-11	5.00563e-10	15.3668
NAT10	0.819237	5.9265	7.18999	2.50522e-11	5.01393e-10	15.3641
PRKD3	1.02056	4.34046	7.18816	2.53053e-11	5.05872e-10	15.3543
NUP50	0.724383	4.95296	7.18706	2.54586e-11	5.08346e-10	15.3485
ZNF800	0.703576	3.80878	7.18541	2.56913e-11	5.12397e-10	15.3396
SHPRH	0.803654	1.58935	7.18195	2.61844e-11	5.21626e-10	15.3211
ZNF207	0.457325	4.85269	7.17906	2.66046e-11	5.29386e-10	15.3057
DDHD2	1.02133	4.11616	7.17825	2.67232e-11	5.31132e-10	15.3013
ZNF674	0.493348	1.60174	7.17772	2.68011e-11	5.32066e-10	15.2985
PDCL	0.675179	4.63788	7.17734	2.68575e-11	5.3257e-10	15.2965
GPD2	0.934075	4.97631	7.17417	2.73301e-11	5.40865e-10	15.2795
NR1D2	0.963673	4.78055	7.17392	2.73666e-11	5.40865e-10	15.2782
STK24	1.0734	4.36642	7.1739	2.737e-11	5.40865e-10	15.2781
MTPN	0.747381	7.45329	7.17261	2.75651e-11	5.44094e-10	15.2712
SCML2	1.21926	2.50526	7.16826	2.82315e-11	5.56611e-10	15.248
TRIM26	0.615704	6.24768	7.16627	2.85425e-11	5.62099e-10	15.2373
PATJ	0.856321	4.27615	7.16333	2.9007e-11	5.70592e-10	15.2216
COPA	0.817292	7.77637	7.16297	2.90651e-11	5.71083e-10	15.2197
BRD3	0.919766	4.18753	7.1625	2.91408e-11	5.71918e-10	15.2172
OSBP	0.674003	5.85778	7.16177	2.92569e-11	5.73542e-10	15.2133
GNPDA1	0.567186	5.44461	7.16	2.95439e-11	5.78508e-10	15.2038
MTR	0.858118	4.04723	7.15649	3.01177e-11	5.89076e-10	15.1851
USP9X	0.863311	5.47225	7.14806	3.15457e-11	6.16304e-10	15.1401
ILRUN	0.720195	7.12391	7.14686	3.17538e-11	6.19666e-10	15.1337
KIF18B	1.08099	3.99723	7.14583	3.19342e-11	6.22482e-10	15.1282
SENP6	0.733452	4.72226	7.13994	3.29824e-11	6.42186e-10	15.0968
RSF1	0.909765	3.93905	7.13799	3.33379e-11	6.48375e-10	15.0864
PRR11	1.01389	4.36571	7.13725	3.34737e-11	6.50281e-10	15.0824
DARS2	0.880758	4.35902	7.13549	3.37968e-11	6.55818e-10	15.0731
RSBN1L	0.664176	4.10493	7.13422	3.40333e-11	6.59664e-10	15.0663
RNF19A	0.940784	5.61704	7.13356	3.41565e-11	6.61307e-10	15.0628
KPNA1	0.685344	4.1546	7.1313	3.45842e-11	6.68835e-10	15.0507
VPS13A	0.804245	2.69307	7.1309	3.46588e-11	6.69525e-10	15.0486
IPPK	0.764252	2.07558	7.13018	3.47955e-11	6.71413e-10	15.0448
ARID4B	0.900128	4.37188	7.12887	3.50463e-11	6.75494e-10	15.0378
EXOC4	0.6564	4.86067	7.12778	3.52564e-11	6.78783e-10	15.032
SRRM1	0.634904	5.4437	7.12727	3.53565e-11	6.79951e-10	15.0293
CLEC6A	0.622161	0.572434	7.12319	3.61551e-11	6.94532e-10	15.0076
ERI2	0.778038	2.66431	7.1228	3.62334e-11	6.95104e-10	15.0055
IL12RB2	1.88193	3.0926	7.12263	3.62656e-11	6.95104e-10	15.0046
UTP20	0.946216	3.95454	7.12231	3.63309e-11	6.95581e-10	15.0028
PAPOLG	0.678753	3.38177	7.11813	3.71724e-11	7.10873e-10	14.9806
ANKIB1	0.797184	5.08715	7.11793	3.72122e-11	7.10873e-10	14.9795
UBXN2B	0.927586	4.82915	7.11672	3.74607e-11	7.14827e-10	14.9731
SLF1	0.629515	2.3079	7.11581	3.76473e-11	7.17592e-10	14.9683
MCUR1	0.769287	5.06575	7.11405	3.80129e-11	7.2375e-10	14.9589
ZNF236	0.693815	2.46066	7.11385	3.80545e-11	7.2375e-10	14.9578
DENND6A	0.681849	4.41342	7.11117	3.86157e-11	7.33613e-10	14.9436
DHX15	0.720994	5.81574	7.10963	3.8944e-11	7.39034e-10	14.9353
SLC25A24	1.03273	4.63138	7.10888	3.91029e-11	7.41232e-10	14.9314
EDC4	0.813898	4.3864	7.10813	3.92635e-11	7.43458e-10	14.9274
OPTN	0.97667	6.4181	7.10771	3.93557e-11	7.44386e-10	14.9251
FAM91A1	0.871247	5.27884	7.10569	3.97929e-11	7.51087e-10	14.9144
HSPA13	1.01879	5.16886	7.10554	3.98242e-11	7.51087e-10	14.9136
ILF3	0.670418	6.69588	7.10535	3.98664e-11	7.51087e-10	14.9126
UBAP2L	0.6997	6.87983	7.10527	3.98846e-11	7.51087e-10	14.9122
NVL	0.760727	4.59669	7.10504	3.99336e-11	7.51188e-10	14.911
EPG5	0.796855	3.29986	7.1032	4.03373e-11	7.57954e-10	14.9012
BAZ1A	0.793274	5.00979	7.10116	4.07904e-11	7.65632e-10	14.8903
TRMT6	0.693869	4.70428	7.10051	4.09373e-11	7.67552e-10	14.8868
SMURF2	0.878661	4.4931	7.09933	4.1202e-11	7.71675e-10	14.8806
ERC1	0.982414	4.29271	7.09717	4.16927e-11	7.79364e-10	14.8691
FBH1	0.783297	5.29907	7.09712	4.17031e-11	7.79364e-10	14.8688
ZXDB	0.748264	3.34914	7.09639	4.1869e-11	7.81615e-10	14.865
CBFB	0.688638	5.67301	7.09549	4.20776e-11	7.84658e-10	14.8601
PRPF4B	0.848547	5.10373	7.09284	4.26905e-11	7.95226e-10	14.8461
WSB2	0.728918	5.83653	7.09159	4.29835e-11	7.99456e-10	14.8394
PSMD10	0.563458	6.23691	7.09148	4.30105e-11	7.99456e-10	14.8388
DSCC1	1.00878	4.56663	7.09051	4.3238e-11	8.02819e-10	14.8337
TOPORS	0.812675	4.51713	7.09005	4.33471e-11	8.03977e-10	14.8313
USP38	0.784304	4.00791	7.08944	4.3491e-11	8.05778e-10	14.828
EIF3A	0.853144	6.95654	7.08813	4.38042e-11	8.10708e-10	14.8211
MED23	0.852287	4.24531	7.08699	4.40784e-11	8.14905e-10	14.815
SIRT1	0.827681	4.33887	7.08659	4.41751e-11	8.15817e-10	14.8129
DNAJC7	0.471322	4.02916	7.08517	4.452e-11	8.21305e-10	14.8053
PDIK1L	0.734758	3.84406	7.08092	4.55664e-11	8.39709e-10	14.7828
USP47	0.822491	3.83326	7.07898	4.60509e-11	8.47731e-10	14.7725
NSD1	0.773095	4.52723	7.07384	4.73622e-11	8.70938e-10	14.7452
AP2B1	0.917281	6.74266	7.07329	4.75046e-11	8.72109e-10	14.7423
PMS2	0.703427	3.09995	7.0732	4.75272e-11	8.72109e-10	14.7418
MOSPD2	0.754418	3.36956	7.07141	4.79942e-11	8.7974e-10	14.7323
MIEF1	0.685161	4.65311	7.07107	4.80835e-11	8.80439e-10	14.7305
ERCC6L2	0.703512	2.20114	7.06914	4.85941e-11	8.88843e-10	14.7202
CDK5RAP2	0.714587	4.57428	7.06877	4.86927e-11	8.89702e-10	14.7183
SGPL1	0.750604	5.44407	7.06749	4.90335e-11	8.94978e-10	14.7115
KIFC1	1.0683	6.107	7.06717	4.91193e-11	8.95595e-10	14.7098
CERS6	1.27559	3.90268	7.0668	4.92186e-11	8.96456e-10	14.7078
ZNF761	0.712399	3.66677	7.06642	4.93197e-11	8.97347e-10	14.7058
DDX60	1.36797	4.28034	7.06502	4.96994e-11	9.03302e-10	14.6984
TCF20	0.939426	5.07581	7.06123	5.07389e-11	9.20688e-10	14.6783
CEP57L1	0.624494	2.04622	7.06114	5.0763e-11	9.20688e-10	14.6778
UTP6	0.585148	4.87857	7.05962	5.11863e-11	9.27389e-10	14.6698
ASAP1	0.912154	4.86468	7.05759	5.1755e-11	9.36706e-10	14.659
ZFP1	0.738943	3.59698	7.05643	5.20838e-11	9.41202e-10	14.6529
CUL4B	0.695341	5.36105	7.05633	5.21128e-11	9.41202e-10	14.6523
ZNF41	0.763673	3.26403	7.05257	5.31934e-11	9.58859e-10	14.6324
PRDM10	0.636831	2.76571	7.05254	5.32019e-11	9.58859e-10	14.6322
KIF2C	1.06139	5.45992	7.05154	5.34938e-11	9.63111e-10	14.6269
LARS2	0.649282	3.01038	7.0499	5.39731e-11	9.70726e-10	14.6183
PRRC2A	0.715323	7.23536	7.04888	5.42755e-11	9.75145e-10	14.6128
ZWILCH	0.804557	3.98851	7.04746	5.46966e-11	9.81687e-10	14.6053
CD274	1.13238	2.49484	7.04648	5.49884e-11	9.85896e-10	14.6001
SSRP1	0.777803	6.88849	7.04413	5.56967e-11	9.97555e-10	14.5877
TLK2	0.670786	4.01279	7.04247	5.6203e-11	1.00558e-09	14.5789
CCNK	0.712499	2.02658	7.03885	5.7325e-11	1.02459e-09	14.5597
L2HGDH	0.764989	2.76207	7.03743	5.77704e-11	1.03148e-09	14.5522
C2orf69	0.702914	4.20256	7.03666	5.80117e-11	1.03471e-09	14.5482
MAP3K21	1.17447	3.1166	7.03632	5.81183e-11	1.03554e-09	14.5464
PPP2R5D	1.03718	5.08785	7.03579	5.82881e-11	1.03749e-09	14.5435
RHOT1	0.658837	4.214	7.03495	5.85545e-11	1.04116e-09	14.5391
TGFBRAP1	0.808645	4.63167	7.03468	5.86423e-11	1.04164e-09	14.5376
TLK1	0.72745	4.61049	7.03296	5.91931e-11	1.05034e-09	14.5286
TMEM170A	0.752998	3.92554	7.03253	5.93307e-11	1.0517e-09	14.5263
TCAIM	0.59265	3.31928	7.03084	5.98796e-11	1.05934e-09	14.5174
SLC35A5	0.754057	4.18725	7.03083	5.98848e-11	1.05934e-09	14.5173
WDR82	0.638741	6.38258	7.026	6.14812e-11	1.08646e-09	14.4917
NUCKS1	0.818775	8.08843	7.01934	6.3748e-11	1.12537e-09	14.4566
CNNM4	0.868066	4.64874	7.01502	6.52643e-11	1.15095e-09	14.4337
FARP2	0.767914	3.14254	7.0148	6.53439e-11	1.15118e-09	14.4325
SLAMF8	1.11944	2.69712	7.01334	6.58656e-11	1.15918e-09	14.4248
PHIP	0.840218	4.18886	7.01247	6.61776e-11	1.16348e-09	14.4202
GMEB1	0.611726	3.75887	7.01181	6.64135e-11	1.16644e-09	14.4168
CASP2	0.720403	5.04008	7.01045	6.69078e-11	1.17392e-09	14.4096
CCDC93	0.783222	4.01765	7.00979	6.71504e-11	1.17698e-09	14.406
PSMD7	0.793476	5.23799	7.00839	6.76618e-11	1.18474e-09	14.3987
KLHL24	0.90787	4.77085	7.00776	6.78937e-11	1.18759e-09	14.3954
ZMPSTE24	0.675523	6.24699	7.00666	6.83006e-11	1.19349e-09	14.3896
YEATS4	0.803356	5.04567	7.00331	6.95581e-11	1.21423e-09	14.3718
TULP3	0.848467	5.43036	7.00018	7.07485e-11	1.23376e-09	14.3553
ZFYVE9	0.844342	3.60846	6.9993	7.10904e-11	1.23847e-09	14.3507
CNST	0.785663	4.18664	6.99785	7.16511e-11	1.24698e-09	14.343
TRIM33	0.906619	4.56088	6.99687	7.20348e-11	1.25239e-09	14.3378
MKRN2	0.634142	3.68986	6.99665	7.21218e-11	1.25263e-09	14.3367
MRS2	0.667147	4.83793	6.99578	7.24617e-11	1.25727e-09	14.3321
SEC24B	0.838416	4.91493	6.99515	7.27087e-11	1.26005e-09	14.3288
ZXDA	0.676197	2.11531	6.995	7.27682e-11	1.26005e-09	14.328
TFRC	1.28937	6.22669	6.99249	7.37673e-11	1.27606e-09	14.3148
RNF41	0.609775	4.59145	6.99125	7.42655e-11	1.28339e-09	14.3082
XPO5	0.857099	5.39477	6.98845	7.5403e-11	1.30174e-09	14.2935
REV3L	1.00012	3.13007	6.98776	7.56873e-11	1.30534e-09	14.2898
ZNF318	0.905154	4.10619	6.98419	7.71692e-11	1.32957e-09	14.271
CACUL1	0.697793	4.51351	6.98279	7.77563e-11	1.33834e-09	14.2636
TRIM59	0.841692	2.89463	6.98213	7.80377e-11	1.34184e-09	14.2601
DSN1	0.717604	5.37395	6.98034	7.88011e-11	1.35362e-09	14.2507
RBM28	0.637536	3.40523	6.97994	7.89683e-11	1.35493e-09	14.2486
SCAI	0.672792	1.99631	6.97979	7.9035e-11	1.35493e-09	14.2478
ZNF101	0.748483	3.25164	6.97943	7.91901e-11	1.3559e-09	14.2459
HNRNPL	0.523119	6.30744	6.97929	7.92491e-11	1.3559e-09	14.2451
TFB2M	0.840001	5.71665	6.97883	7.94473e-11	1.35794e-09	14.2427
LCLAT1	0.757146	3.55331	6.97683	8.03156e-11	1.37142e-09	14.2322
ING3	0.653566	3.09977	6.97568	8.08177e-11	1.37863e-09	14.2261
PRKAR2A	0.856687	5.10768	6.97516	8.10442e-11	1.38112e-09	14.2234
TEFM	0.526572	2.67185	6.97339	8.18272e-11	1.39299e-09	14.2141
CCDC138	0.837272	2.5357	6.97322	8.19024e-11	1.39299e-09	14.2132
HACE1	0.835869	2.67179	6.97219	8.23611e-11	1.39941e-09	14.2077
PSMD2	0.741421	7.72534	6.97032	8.32016e-11	1.41229e-09	14.1979
VPS54	0.701058	5.04978	6.968	8.42533e-11	1.42874e-09	14.1857
BCOR	0.857675	3.85338	6.96549	8.54103e-11	1.44693e-09	14.1724
SEC63	0.736348	5.9908	6.96332	8.64197e-11	1.46138e-09	14.161
ADSS2	0.803937	6.19755	6.96329	8.64328e-11	1.46138e-09	14.1609
EIF4G2	0.751823	8.45063	6.9615	8.72766e-11	1.4742e-09	14.1514
ZNF35	0.620105	3.60643	6.96062	8.76926e-11	1.47977e-09	14.1468
HTATSF1	0.718285	7.04996	6.95864	8.86371e-11	1.49424e-09	14.1364
SPTLC1	0.718173	5.27497	6.95681	8.95251e-11	1.50715e-09	14.1267
MEX3C	0.908006	4.61355	6.9567	8.95778e-11	1.50715e-09	14.1262
RPRD1A	0.869336	4.74913	6.95576	9.00333e-11	1.51333e-09	14.1212
C5orf22	0.834371	4.74142	6.95476	9.05236e-11	1.52009e-09	14.116
CCT2	0.738628	7.0936	6.95306	9.13589e-11	1.53262e-09	14.107
ZCCHC2	0.783059	3.36472	6.95141	9.21803e-11	1.5449e-09	14.0984
BTN3A1	1.00374	4.67484	6.9511	9.23356e-11	1.54599e-09	14.0967
GOLGA4	0.942454	5.40661	6.9494	9.31893e-11	1.55877e-09	14.0878
ATG4C	0.529946	3.99019	6.94886	9.34622e-11	1.56182e-09	14.0849
ACBD3	0.79976	6.27864	6.9451	9.5384e-11	1.59239e-09	14.0652
VASH2	1.33603	2.53941	6.94467	9.56079e-11	1.59458e-09	14.0629
CDC7	1.04839	4.3365	6.94393	9.59883e-11	1.59937e-09	14.059
XPO6	0.60426	5.96468	6.94206	9.69688e-11	1.61415e-09	14.0492
KIAA1958	0.814186	1.98223	6.94034	9.78723e-11	1.62761e-09	14.0402
ZNF200	0.481241	2.65686	6.93991	9.81009e-11	1.62984e-09	14.0379
MBTD1	0.90424	3.8166	6.93949	9.83248e-11	1.63198e-09	14.0357
GYG1	0.596723	4.87813	6.93846	9.88728e-11	1.6395e-09	14.0303
UBXN4	0.754076	6.69076	6.9361	1.00144e-10	1.65897e-09	14.0179
SLC25A51	0.643894	3.54641	6.93577	1.00326e-10	1.66039e-09	14.0161
ZSCAN20	0.712752	1.80206	6.93466	1.0093e-10	1.66878e-09	14.0103
CHD8	0.678759	3.94061	6.93353	1.01549e-10	1.67741e-09	14.0044
ZNF641	0.721312	3.38315	6.9316	1.02611e-10	1.69333e-09	13.9943
RPS6KA3	0.851356	4.18364	6.93034	1.03313e-10	1.70327e-09	13.9876
MLLT10	0.789363	3.93819	6.92911	1.04001e-10	1.71298e-09	13.9812
PKN2	0.877056	4.8132	6.92777	1.04762e-10	1.72387e-09	13.9741
CRNKL1	0.692659	5.12024	6.92749	1.04918e-10	1.72478e-09	13.9727
TDG	0.694264	4.30562	6.92715	1.05114e-10	1.72636e-09	13.9709
VPS4B	0.857788	5.64949	6.92581	1.05875e-10	1.7372e-09	13.9639
TTC26	0.711465	3.09452	6.92502	1.06331e-10	1.74302e-09	13.9597
WIPF2	0.671456	4.60463	6.92472	1.065e-10	1.74412e-09	13.9581
MKLN1	0.750852	3.56364	6.92409	1.06864e-10	1.74736e-09	13.9548
ABHD14A	-0.614931	2.46301	-6.92403	1.069e-10	1.74736e-09	13.9545
PTPN11	0.890037	6.01995	6.92362	1.07138e-10	1.74958e-09	13.9523
VMA21	0.636873	5.27063	6.92335	1.07295e-10	1.75048e-09	13.9509
PIP5K1A	0.853056	5.90323	6.92247	1.07803e-10	1.75711e-09	13.9463
EIF3C	0.779638	2.4121	6.92203	1.08061e-10	1.75965e-09	13.944
ZNF451	0.640599	3.17964	6.91731	1.10854e-10	1.80342e-09	13.9192
MCM3	0.878406	7.49981	6.91515	1.12154e-10	1.82285e-09	13.9079
PPP1R12A	0.78751	4.1892	6.91393	1.12894e-10	1.83314e-09	13.9015
ZRANB3	0.564058	1.727	6.91143	1.14433e-10	1.85557e-09	13.8884
SON	0.794332	6.00568	6.91133	1.14491e-10	1.85557e-09	13.8879
ZNF664	0.926816	6.4578	6.91071	1.14876e-10	1.86006e-09	13.8846
ZNF644	0.906316	4.76783	6.90824	1.1642e-10	1.8833e-09	13.8717
FAM135A	0.836505	2.44745	6.90772	1.16749e-10	1.88684e-09	13.8689
SPATS2	0.687257	4.25174	6.90753	1.16867e-10	1.88697e-09	13.868
ZNF260	0.912427	4.51118	6.90722	1.17064e-10	1.88839e-09	13.8663
DDX58	1.11784	5.25169	6.90383	1.19225e-10	1.92145e-09	13.8485
LTN1	0.923937	3.8651	6.90342	1.19488e-10	1.92389e-09	13.8464
NLN	0.751001	3.97773	6.90322	1.19615e-10	1.92413e-09	13.8454
ZNF551	0.863641	2.77747	6.90276	1.19914e-10	1.92714e-09	13.843
PUM2	0.698377	6.37616	6.9024	1.20145e-10	1.92904e-09	13.8411
PHF20	0.708798	4.68543	6.90079	1.21197e-10	1.94413e-09	13.8326
TRAF3IP1	0.668637	4.07102	6.89754	1.2334e-10	1.97665e-09	13.8156
WRN	0.804194	3.13672	6.89531	1.24831e-10	1.99868e-09	13.8039
PLCH1	1.33463	3.4217	6.89339	1.2613e-10	2.01761e-09	13.7939
HSPA9	0.647723	6.62854	6.89321	1.26257e-10	2.01776e-09	13.7929
FNBP1	0.855804	5.10773	6.89264	1.26647e-10	2.02212e-09	13.7899
COG2	0.711036	3.08784	6.89144	1.27467e-10	2.03332e-09	13.7837
HSF2	0.802378	4.70434	6.89073	1.27953e-10	2.0392e-09	13.78
ANKRD13C	0.622988	3.9404	6.8893	1.28945e-10	2.05311e-09	13.7725
SAMHD1	0.933547	5.12075	6.88677	1.30715e-10	2.07936e-09	13.7592
SSH2	0.732385	3.13855	6.88645	1.3094e-10	2.08101e-09	13.7576
CEP152	0.592933	1.98235	6.88616	1.31147e-10	2.08237e-09	13.756
CAMSAP1	0.808899	4.22134	6.88506	1.31926e-10	2.0914e-09	13.7503
UBR3	0.813644	4.07152	6.88502	1.31958e-10	2.0914e-09	13.75
RPRD1B	0.783875	4.72352	6.88447	1.32345e-10	2.09561e-09	13.7472
MED13	0.945392	4.50704	6.88405	1.32651e-10	2.09851e-09	13.745
TOMM70	0.626752	6.27958	6.88368	1.32912e-10	2.10071e-09	13.743
DLAT	0.859096	5.05314	6.87958	1.3588e-10	2.14565e-09	13.7216
CHM	0.821589	3.04153	6.87933	1.36062e-10	2.14656e-09	13.7203
PTP4A2	0.567434	6.73958	6.87902	1.36292e-10	2.14822e-09	13.7187
TAF4	0.608066	3.35453	6.87881	1.3645e-10	2.14874e-09	13.7175
CEPT1	0.752739	3.35323	6.87825	1.36856e-10	2.15317e-09	13.7147
RCC2	0.740469	7.60935	6.87724	1.37606e-10	2.16299e-09	13.7094
RIC1	0.778115	3.65699	6.87522	1.39113e-10	2.18468e-09	13.6988
UCHL5	0.688546	4.85886	6.87479	1.39436e-10	2.18777e-09	13.6965
AKIRIN1	0.75936	6.50197	6.87317	1.40656e-10	2.20489e-09	13.6881
MBP	1.00156	2.95714	6.86895	1.43887e-10	2.25349e-09	13.666
UBE2Z	0.561561	6.27368	6.86693	1.45464e-10	2.27611e-09	13.6554
CFAP97	0.818345	4.36111	6.86587	1.4629e-10	2.28696e-09	13.6499
CLINT1	0.727794	5.46164	6.86568	1.4644e-10	2.28723e-09	13.649
TP53BP1	0.868521	3.32851	6.86397	1.47796e-10	2.30631e-09	13.64
ELAVL1	0.521965	5.81855	6.86173	1.49587e-10	2.33214e-09	13.6283
USP28	0.752822	4.23599	6.85927	1.51582e-10	2.36112e-09	13.6155
CNOT9	0.639771	5.65534	6.85672	1.53677e-10	2.39036e-09	13.6021
GEN1	0.675477	3.03178	6.85665	1.53737e-10	2.39036e-09	13.6017
RAB3IP	0.922089	2.71045	6.85561	1.54595e-10	2.39962e-09	13.5963
LAMP3	1.50817	4.46674	6.85559	1.54612e-10	2.39962e-09	13.5962
ADIPOR2	0.746776	5.94365	6.85493	1.55161e-10	2.40598e-09	13.5928
BTN3A3	1.02927	4.15603	6.85404	1.55909e-10	2.4154e-09	13.5881
AKAP5	0.752099	1.50121	6.85383	1.56087e-10	2.41598e-09	13.587
MTF2	0.627744	4.17809	6.85346	1.56394e-10	2.41856e-09	13.5851
C2CD5	0.847887	4.42258	6.85073	1.58709e-10	2.45215e-09	13.5709
C1orf109	0.718722	4.11374	6.84746	1.61521e-10	2.49336e-09	13.5538
LRBA	0.929596	4.01748	6.84585	1.62931e-10	2.51287e-09	13.5454
ZBTB2	0.601613	4.86059	6.84484	1.63812e-10	2.5242e-09	13.5401
SIX4	0.950465	3.11962	6.84172	1.66581e-10	2.56457e-09	13.5239
CHEK2	0.688986	3.9214	6.84103	1.67199e-10	2.57179e-09	13.5203
CELF1	0.593923	5.46647	6.84018	1.67965e-10	2.58127e-09	13.5158
CCNJ	0.862106	3.76705	6.83707	1.70802e-10	2.62251e-09	13.4996
TAF5	0.690317	3.30291	6.83624	1.7156e-10	2.63069e-09	13.4953
SMC5	0.839095	4.69581	6.83616	1.7164e-10	2.63069e-09	13.4948
CXCL9	2.29738	6.57112	6.83268	1.74876e-10	2.6779e-09	13.4767
ZSCAN29	0.651842	3.42014	6.83236	1.75171e-10	2.68003e-09	13.4751
DIP2B	0.834343	4.35708	6.83163	1.75863e-10	2.68824e-09	13.4712
CD2AP	0.954208	5.27878	6.83078	1.7667e-10	2.69818e-09	13.4668
ATF7IP	0.758793	4.8855	6.82887	1.78485e-10	2.72348e-09	13.4569
FBXL14	0.930992	4.15055	6.82674	1.80537e-10	2.75234e-09	13.4458
LCORL	0.553671	1.59219	6.82466	1.82564e-10	2.78079e-09	13.4349
TTC27	0.624633	4.86045	6.82378	1.83431e-10	2.79152e-09	13.4303
ZNF507	0.816019	3.36029	6.82299	1.84208e-10	2.80087e-09	13.4262
PLCB4	1.21293	3.69984	6.82065	1.86542e-10	2.83386e-09	13.414
ALS2	0.770445	3.31056	6.8201	1.87093e-10	2.83973e-09	13.4112
ELOB	-0.670579	8.49908	-6.81797	1.89239e-10	2.86977e-09	13.4001
TTC37	0.752337	4.46471	6.81742	1.89802e-10	2.87576e-09	13.3972
LCOR	0.647103	2.48705	6.81662	1.90613e-10	2.88551e-09	13.3931
ABCB7	0.622364	4.02523	6.81626	1.90983e-10	2.88858e-09	13.3912
SMARCD1	0.579236	5.56403	6.816	1.91252e-10	2.89011e-09	13.3898
RAD54L2	0.672858	3.48627	6.81432	1.92976e-10	2.9136e-09	13.3811
MAP3K2	0.787323	4.32197	6.81095	1.96496e-10	2.96414e-09	13.3636
JOSD1	0.657797	6.27903	6.80899	1.9857e-10	2.99281e-09	13.3534
MALT1	0.697745	3.47022	6.80851	1.99088e-10	2.99799e-09	13.3509
ZNF81	0.655981	2.10074	6.80692	2.00789e-10	3.02097e-09	13.3426
LIN7C	0.657671	4.54772	6.80444	2.03481e-10	3.05879e-09	13.3297
CORO1C	0.729811	6.22965	6.80165	2.06537e-10	3.10202e-09	13.3152
UBR5	1.00979	5.20646	6.80069	2.07603e-10	3.11531e-09	13.3102
KIAA2026	0.867303	3.82407	6.80049	2.07831e-10	3.11601e-09	13.3091
BRPF1	0.620252	4.34972	6.79969	2.08724e-10	3.12667e-09	13.305
PTGES3	0.60694	8.21798	6.79838	2.10185e-10	3.14583e-09	13.2982
MCM4	1.02157	6.70296	6.79804	2.1057e-10	3.14885e-09	13.2964
RABGAP1	0.744876	4.97137	6.7951	2.13918e-10	3.19614e-09	13.2811
MAP3K7	0.744565	4.82239	6.79339	2.15883e-10	3.2227e-09	13.2723
TTF1	0.620595	4.30324	6.79303	2.163e-10	3.22456e-09	13.2704
XIAP	0.734086	4.61711	6.79294	2.16409e-10	3.22456e-09	13.2699
ZFP30	0.843802	2.74863	6.79276	2.16609e-10	3.22456e-09	13.269
DDX6	0.716326	5.72924	6.79264	2.16757e-10	3.22456e-09	13.2683
SAMD9L	1.23947	4.40526	6.79241	2.17014e-10	3.2256e-09	13.2672
ZDHHC13	0.841785	3.8457	6.79202	2.17476e-10	3.22968e-09	13.2651
ASAP2	1.12585	3.25564	6.79172	2.17818e-10	3.23197e-09	13.2636
PIK3C2A	0.932767	4.36742	6.78908	2.20923e-10	3.27522e-09	13.2499
ASXL1	0.681759	4.50364	6.78758	2.22706e-10	3.29881e-09	13.2421
PLEKHB2	0.732684	5.69426	6.78697	2.23428e-10	3.30666e-09	13.2389
BIRC2	0.828214	5.7581	6.78659	2.23891e-10	3.31067e-09	13.2369
USP6NL	0.788715	3.67021	6.78562	2.25053e-10	3.32215e-09	13.2319
FOXJ2	0.819366	4.62347	6.78562	2.25054e-10	3.32215e-09	13.2319
CENPO	0.712494	3.3494	6.78457	2.26314e-10	3.33789e-09	13.2265
POFUT1	0.729901	5.49634	6.78193	2.29534e-10	3.37882e-09	13.2128
MTIF2	0.631873	5.70154	6.78192	2.29554e-10	3.37882e-09	13.2127
FANCL	0.765761	4.66408	6.78178	2.29726e-10	3.37882e-09	13.2119
FEN1	0.796506	6.37281	6.78166	2.29875e-10	3.37882e-09	13.2113
MAPRE1	0.664667	7.85643	6.78145	2.30127e-10	3.37965e-09	13.2103
TAF3	0.596677	3.78902	6.77627	2.36598e-10	3.47172e-09	13.1833
MASTL	0.804195	4.27355	6.77502	2.3818e-10	3.49195e-09	13.1769
BBX	0.849691	4.31357	6.7744	2.38973e-10	3.50061e-09	13.1736
NSUN4	0.559657	3.83293	6.77323	2.40469e-10	3.51952e-09	13.1676
VEZT	0.644954	4.36054	6.77058	2.43906e-10	3.56679e-09	13.1538
GNL3L	0.712237	4.01308	6.76981	2.4491e-10	3.57625e-09	13.1498
GPATCH11	0.627704	3.68134	6.76976	2.44968e-10	3.57625e-09	13.1496
FBXO28	0.748621	5.17616	6.7676	2.47823e-10	3.61486e-09	13.1384
CYBB	1.37358	5.58185	6.76734	2.48156e-10	3.61665e-09	13.1371
SLTM	0.581269	5.17968	6.76706	2.48535e-10	3.61911e-09	13.1356
GRSF1	0.592342	5.74316	6.76398	2.52658e-10	3.67603e-09	13.1196
C12orf4	0.747889	4.20978	6.76363	2.53123e-10	3.6797e-09	13.1178
GPR107	0.818327	5.52229	6.76041	2.57518e-10	3.74042e-09	13.1011
AKAP9	0.936048	3.98757	6.75948	2.58807e-10	3.7541e-09	13.0963
GRPEL2	0.615296	4.19038	6.75941	2.58896e-10	3.7541e-09	13.096
BRD2	0.635417	6.55653	6.75527	2.64685e-10	3.83482e-09	13.0745
NPEPPS	0.623094	4.13377	6.75455	2.6571e-10	3.84453e-09	13.0707
ATAD2B	0.670471	3.11582	6.75448	2.65802e-10	3.84453e-09	13.0704
USP48	0.599311	4.55061	6.75394	2.66568e-10	3.85236e-09	13.0676
WDR44	0.79813	3.76762	6.75358	2.67083e-10	3.85658e-09	13.0657
DDX3X	0.724692	6.16195	6.75204	2.69292e-10	3.88305e-09	13.0578
DENR	0.631601	6.4299	6.75199	2.69368e-10	3.88305e-09	13.0575
THAP5	0.669441	4.01736	6.75059	2.71389e-10	3.90891e-09	13.0502
BPNT1	0.705392	5.8567	6.75023	2.71904e-10	3.91306e-09	13.0484
CSGALNACT2	0.821193	4.94542	6.75007	2.72133e-10	3.91307e-09	13.0476
OTUD6B	0.827417	3.93036	6.74904	2.73634e-10	3.93137e-09	13.0422
CMPK1	0.642554	7.34519	6.74756	2.75815e-10	3.9594e-09	13.0345
CLOCK	0.820163	3.76521	6.7472	2.7634e-10	3.96364e-09	13.0327
CENPK	0.762627	2.52583	6.7452	2.79304e-10	4.00177e-09	13.0223
CLDN5	-1.24176	2.47461	-6.74506	2.79513e-10	4.00177e-09	13.0216
AMBRA1	0.630184	4.3482	6.74494	2.79696e-10	4.00177e-09	13.021
CPSF7	0.601304	5.83545	6.74372	2.81522e-10	4.02204e-09	13.0147
UTP23	0.825732	4.24516	6.74368	2.8158e-10	4.02204e-09	13.0145
KIAA0100	0.822703	5.4983	6.74329	2.82165e-10	4.02705e-09	13.0125
SPDL1	0.701975	3.82784	6.73697	2.91834e-10	4.16159e-09	12.9798
EIF4G1	0.667664	7.7122	6.7359	2.93502e-10	4.18192e-09	12.9742
HS2ST1	0.713299	4.41876	6.73529	2.94462e-10	4.19212e-09	12.9711
POLR3A	0.709539	3.92923	6.72855	3.05237e-10	4.34193e-09	12.9362
CEP57	0.684442	4.0699	6.72816	3.05866e-10	4.34729e-09	12.9342
UNG	0.800752	6.47052	6.72796	3.06192e-10	4.34834e-09	12.9332
AGO2	0.957188	4.45591	6.72769	3.06627e-10	4.35092e-09	12.9318
YTHDC1	0.566599	5.3158	6.72552	3.10194e-10	4.3979e-09	12.9206
DHX57	0.661577	3.94753	6.72315	3.14139e-10	4.45017e-09	12.9083
EFTUD2	0.584202	5.32629	6.7146	3.28768e-10	4.65359e-09	12.8642
PPP1CC	0.579674	6.27021	6.71423	3.29415e-10	4.65891e-09	12.8623
SEC23B	0.878194	6.07037	6.7124	3.32648e-10	4.70077e-09	12.8528
DDX52	0.666178	3.63544	6.71186	3.33592e-10	4.71025e-09	12.85
ATG3	0.498949	4.98963	6.71067	3.3571e-10	4.73626e-09	12.8439
SPC25	0.878131	4.21731	6.70797	3.40569e-10	4.80088e-09	12.83
EP300	0.932147	4.92203	6.70768	3.41096e-10	4.80438e-09	12.8285
SF3A3	0.624583	6.69857	6.70459	3.46746e-10	4.87997e-09	12.8125
ZBTB41	0.930457	4.06458	6.70421	3.47446e-10	4.88419e-09	12.8106
RBAK	0.667919	3.71363	6.70412	3.47614e-10	4.88419e-09	12.8101
KIAA1143	0.628517	4.2482	6.7036	3.48591e-10	4.89393e-09	12.8074
USP22	0.956307	6.05837	6.7033	3.49148e-10	4.89775e-09	12.8058
DMXL2	0.77767	2.41331	6.70032	3.54721e-10	4.97187e-09	12.7905
TET3	0.885043	4.07802	6.69949	3.56293e-10	4.98985e-09	12.7862
VPS26A	0.676098	5.72523	6.69905	3.57118e-10	4.99733e-09	12.7839
DZIP3	0.673637	3.1048	6.69826	3.58632e-10	5.01443e-09	12.7798
CDC73	0.735575	4.38493	6.69773	3.59629e-10	5.0243e-09	12.7771
DDX23	0.578556	6.20442	6.69757	3.59932e-10	5.02445e-09	12.7763
ARNT2	1.52281	3.43683	6.69674	3.61531e-10	5.04268e-09	12.772
IPP	0.73241	3.75142	6.69477	3.65343e-10	5.09173e-09	12.7618
CCDC91	0.770001	3.67739	6.69305	3.68685e-10	5.13414e-09	12.753
CDYL	0.749335	4.83292	6.69232	3.70118e-10	5.14994e-09	12.7492
HIPK1	0.928693	4.79735	6.69161	3.71521e-10	5.16528e-09	12.7456
ICE1	0.920139	4.73503	6.68936	3.75989e-10	5.22059e-09	12.734
TRIM24	0.647434	4.30124	6.6893	3.76106e-10	5.22059e-09	12.7337
APIP	0.762148	3.6001	6.68709	3.80545e-10	5.27795e-09	12.7223
PARP4	0.805763	5.42303	6.68618	3.82397e-10	5.29937e-09	12.7176
USF3	0.862023	3.06197	6.68572	3.83334e-10	5.30808e-09	12.7152
PTPN2	0.633974	4.20628	6.6836	3.8768e-10	5.36282e-09	12.7043
ZBTB9	0.623032	4.46434	6.68336	3.88162e-10	5.36282e-09	12.7031
WDR12	0.661964	3.85835	6.68333	3.88222e-10	5.36282e-09	12.7029
ZNF544	0.602078	3.93799	6.68279	3.89338e-10	5.37392e-09	12.7001
ILF2	0.824612	9.18104	6.68043	3.9425e-10	5.43647e-09	12.688
GANAB	0.672463	8.50822	6.68031	3.94501e-10	5.43647e-09	12.6874
PROSER1	0.782738	4.86119	6.67727	4.00926e-10	5.52059e-09	12.6717
METTL15	0.552745	2.42122	6.67663	4.02286e-10	5.53489e-09	12.6684
UBAP2	0.701038	4.43585	6.67619	4.03232e-10	5.54347e-09	12.6661
BMS1	0.65352	5.16753	6.6759	4.03837e-10	5.54736e-09	12.6647
RAB6A	0.683182	6.85696	6.67428	4.07337e-10	5.59098e-09	12.6563
UBQLN2	0.721213	5.65361	6.67403	4.07863e-10	5.59373e-09	12.6551
ERBIN	0.789619	4.73697	6.67307	4.09965e-10	5.61809e-09	12.6501
AP3M1	0.729255	5.04448	6.67145	4.13504e-10	5.65924e-09	12.6417
SLC44A1	0.76463	5.20478	6.67139	4.13626e-10	5.65924e-09	12.6415
ELF2	0.6436	3.91385	6.67118	4.14076e-10	5.66091e-09	12.6404
OXNAD1	0.556002	3.05483	6.669	4.18913e-10	5.72249e-09	12.6291
C18orf25	0.682093	3.61825	6.66739	4.22494e-10	5.76682e-09	12.6209
RNF38	0.795922	4.8086	6.6665	4.24487e-10	5.789e-09	12.6163
ARHGAP21	0.99471	4.95882	6.66637	4.24791e-10	5.789e-09	12.6156
PTPN22	0.935813	2.44948	6.6602	4.38915e-10	5.97371e-09	12.5839
GRB2	0.500827	7.02485	6.66015	4.39039e-10	5.97371e-09	12.5836
CHUK	0.679863	3.8184	6.65811	4.43801e-10	6.03373e-09	12.5732
SSB	0.627106	5.96464	6.65695	4.4653e-10	6.06604e-09	12.5672
GPSM2	0.908463	2.75817	6.65677	4.46962e-10	6.06712e-09	12.5663
PCNP	0.611993	6.99264	6.65627	4.48149e-10	6.07843e-09	12.5637
INPP4A	0.594267	3.26591	6.65605	4.48678e-10	6.08082e-09	12.5626
ZGRF1	0.669081	1.90299	6.65554	4.49882e-10	6.09234e-09	12.56
NT5C3A	0.708224	4.92893	6.65533	4.5039e-10	6.09443e-09	12.5589
PARP9	1.02758	5.10852	6.64993	4.63466e-10	6.26644e-09	12.5311
AEBP2	0.790482	4.13075	6.64941	4.64739e-10	6.27871e-09	12.5285
ZFX	0.72328	4.01853	6.64906	4.6559e-10	6.28528e-09	12.5267
BROX	0.771234	5.72595	6.64885	4.66106e-10	6.28732e-09	12.5256
DNTTIP2	0.569637	5.22484	6.64843	4.67159e-10	6.29658e-09	12.5234
DCLRE1C	0.673512	3.48821	6.64701	4.70666e-10	6.33889e-09	12.5162
CPSF2	0.647519	4.13959	6.64607	4.73037e-10	6.36584e-09	12.5113
CHORDC1	0.704137	3.64372	6.64578	4.73745e-10	6.37039e-09	12.5098
ERAP1	0.871761	4.39839	6.64342	4.79711e-10	6.44191e-09	12.4977
ORC2	0.611671	4.02778	6.64338	4.79813e-10	6.44191e-09	12.4975
EXOC2	0.722888	4.79214	6.64308	4.8058e-10	6.44665e-09	12.496
GDI2	0.713066	8.60514	6.64283	4.81208e-10	6.44665e-09	12.4947
MFN1	0.792972	5.11967	6.6428	4.81289e-10	6.44665e-09	12.4945
LYZ	1.90346	7.4937	6.64105	4.85775e-10	6.50167e-09	12.4855
OR2I1P	1.82522	3.3908	6.64065	4.86791e-10	6.50902e-09	12.4835
ANKRD40	0.860492	4.60449	6.6405	4.87189e-10	6.50902e-09	12.4827
NCL	0.584763	8.25675	6.64039	4.87458e-10	6.50902e-09	12.4822
COX7A1	-1.06153	4.13229	-6.63957	4.89576e-10	6.53223e-09	12.478
UTP15	0.527506	3.22425	6.63928	4.90327e-10	6.53719e-09	12.4765
NCOA5	0.546812	6.02901	6.63912	4.90751e-10	6.53777e-09	12.4756
VAPB	0.666937	4.77857	6.63875	4.91709e-10	6.54547e-09	12.4738
FAM199X	0.728104	4.63118	6.63764	4.94597e-10	6.57883e-09	12.4681
NFX1	0.660115	4.81368	6.63666	4.97191e-10	6.60822e-09	12.463
OBI1	0.710888	3.63142	6.63391	5.04462e-10	6.69969e-09	12.4489
POLE	0.73832	3.7028	6.63278	5.07494e-10	6.73176e-09	12.4431
CDK13	0.532901	3.25235	6.63272	5.07659e-10	6.73176e-09	12.4428
TCEANC2	0.499896	2.32356	6.63237	5.08591e-10	6.73892e-09	12.441
ZDHHC20	0.863631	5.75861	6.63125	5.11611e-10	6.77374e-09	12.4353
TMED8	0.704189	3.86491	6.63078	5.12878e-10	6.78528e-09	12.4329
PPARA	0.820066	2.96101	6.63056	5.13482e-10	6.78806e-09	12.4317
PPIP5K2	0.693745	3.05603	6.62933	5.16827e-10	6.82703e-09	12.4254
TASOR2	1.15641	5.33394	6.62894	5.17893e-10	6.83587e-09	12.4235
PPM1D	0.728564	3.74425	6.62672	5.24016e-10	6.91138e-09	12.4121
ZBTB14	0.631512	3.40963	6.62596	5.26126e-10	6.9339e-09	12.4082
DDX50	0.61392	5.91499	6.62082	5.40617e-10	7.11944e-09	12.3818
VPS52	0.731021	4.83718	6.61846	5.47392e-10	7.20314e-09	12.3697
LATS1	0.851519	3.91435	6.61747	5.50253e-10	7.23526e-09	12.3647
CCR5	1.21196	3.63842	6.61727	5.50858e-10	7.23768e-09	12.3636
ZNF445	0.656967	2.48728	6.61691	5.51883e-10	7.24562e-09	12.3618
NF1	0.869847	3.31971	6.61282	5.63937e-10	7.39823e-09	12.3409
ATP11A	1.02242	3.7556	6.61144	5.68082e-10	7.44694e-09	12.3338
CCR8	0.945986	1.58305	6.61109	5.69136e-10	7.45507e-09	12.332
INKA1	-0.866491	2.45965	-6.61074	5.70167e-10	7.4629e-09	12.3302
ZNF24	0.765459	5.32735	6.6095	5.73913e-10	7.50623e-09	12.3239
CCDC112	0.690158	3.70003	6.60815	5.78037e-10	7.55442e-09	12.3169
TLR8	1.05058	1.86595	6.60758	5.79778e-10	7.56581e-09	12.314
SNX6	0.737427	5.67161	6.60757	5.79788e-10	7.56581e-09	12.314
TMED5	0.719804	4.54984	6.60524	5.86962e-10	7.65363e-09	12.3021
QRSL1	0.680153	4.37979	6.60383	5.91344e-10	7.70493e-09	12.2949
CTSS	1.13027	6.555	6.60306	5.93751e-10	7.73044e-09	12.2909
NOCT	1.06524	3.86271	6.60049	6.01862e-10	7.83013e-09	12.2778
MRPL41	-0.853246	7.0094	-6.59771	6.10754e-10	7.9398e-09	12.2635
S100PBP	0.57193	3.46737	6.5935	6.24458e-10	8.11183e-09	12.242
RDX	0.856721	5.07511	6.59111	6.32382e-10	8.20856e-09	12.2298
ZNF37A	0.751546	3.198	6.59075	6.33601e-10	8.21819e-09	12.2279
TP53BP2	1.07994	5.78558	6.58974	6.36982e-10	8.25582e-09	12.2228
EP400	0.677215	3.56622	6.58726	6.45354e-10	8.35804e-09	12.2101
RAB14	0.72374	6.50925	6.58629	6.48663e-10	8.39457e-09	12.2052
PDHX	0.739608	5.26189	6.5857	6.50676e-10	8.41431e-09	12.2022
SEC24A	0.800786	4.24831	6.58503	6.52993e-10	8.43793e-09	12.1987
CLASP2	0.715392	3.25896	6.58336	6.58741e-10	8.50581e-09	12.1902
ZNF292	0.886087	3.68228	6.58243	6.61976e-10	8.54118e-09	12.1855
PANK1	0.76583	2.25113	6.58189	6.63863e-10	8.55911e-09	12.1827
NUP93	0.621697	4.51833	6.57997	6.70635e-10	8.63994e-09	12.1729
SP4	0.798994	2.77934	6.57942	6.72562e-10	8.6583e-09	12.1701
FGD6	0.862234	3.06501	6.57736	6.79907e-10	8.74631e-09	12.1596
MAT2B	0.582455	5.28666	6.5767	6.82267e-10	8.77011e-09	12.1562
CENPP	0.496312	1.40186	6.57582	6.85433e-10	8.80423e-09	12.1517
WDR48	0.71734	4.4678	6.57491	6.88716e-10	8.83944e-09	12.1471
GZF1	0.581058	3.87389	6.57478	6.89201e-10	8.83944e-09	12.1464
NCOR1	0.699197	4.55333	6.57415	6.91505e-10	8.86239e-09	12.1432
BTF3L4	0.583968	5.40977	6.5733	6.9458e-10	8.89517e-09	12.1389
C2orf49	0.67733	4.05488	6.57112	7.02625e-10	8.98498e-09	12.1277
ATF1	0.687002	4.52261	6.57111	7.02637e-10	8.98498e-09	12.1277
MBTPS2	0.732523	3.39431	6.56733	7.16753e-10	9.15869e-09	12.1084
NIPA2	0.781962	4.58219	6.56509	7.25252e-10	9.26041e-09	12.097
ATP6V1A	0.69702	6.04666	6.56379	7.30254e-10	9.31737e-09	12.0903
DNAJC6	1.22218	2.12583	6.56357	7.31079e-10	9.32099e-09	12.0892
GCFC2	0.592016	3.75509	6.56291	7.33629e-10	9.34658e-09	12.0858
CXCL11	1.87005	4.82056	6.56262	7.34732e-10	9.35147e-09	12.0844
C1orf50	0.535419	1.24247	6.56253	7.351e-10	9.35147e-09	12.0839
IPO5	0.913405	6.09146	6.56233	7.35882e-10	9.3545e-09	12.0829
DCAF16	0.753534	4.60113	6.56111	7.40588e-10	9.40738e-09	12.0767
FAM20B	0.765508	5.82829	6.56041	7.4332e-10	9.43512e-09	12.0731
RAVER1	0.856783	3.86507	6.55999	7.44983e-10	9.44927e-09	12.071
CFAP126	1.08432	4.38098	6.55859	7.50481e-10	9.51198e-09	12.0638
DLG1	0.778054	4.07304	6.55833	7.51489e-10	9.51775e-09	12.0625
ZNF407	0.627458	2.36068	6.55805	7.52601e-10	9.52483e-09	12.0611
XRCC2	0.943167	3.15343	6.55764	7.54226e-10	9.53839e-09	12.059
PTPRF	0.980767	7.85952	6.55731	7.55562e-10	9.54826e-09	12.0573
TM7SF3	1.06335	5.50825	6.55464	7.66212e-10	9.66732e-09	12.0437
SUDS3	0.629442	5.38247	6.5546	7.66391e-10	9.66732e-09	12.0435
TXLNG	0.849279	4.74894	6.55453	7.66668e-10	9.66732e-09	12.0432
CEP128	0.573612	2.08165	6.55436	7.67355e-10	9.66889e-09	12.0423
OIP5	0.694589	2.30815	6.55281	7.7365e-10	9.74108e-09	12.0344
GGNBP2	0.502831	4.51838	6.55188	7.77438e-10	9.78163e-09	12.0296
ABCD3	0.807407	4.78912	6.55155	7.78766e-10	9.79118e-09	12.028
KNOP1	0.604985	3.54648	6.55113	7.80477e-10	9.79986e-09	12.0258
GGA2	0.612264	5.55829	6.5511	7.80595e-10	9.79986e-09	12.0257
MAN1A2	0.780151	4.55834	6.55055	7.82887e-10	9.82146e-09	12.0229
ACTR8	0.528826	4.20021	6.5483	7.92205e-10	9.92628e-09	12.0114
ZBTB21	0.732394	3.41398	6.54825	7.92395e-10	9.92628e-09	12.0112
TOP3A	0.617789	3.99589	6.54696	7.97796e-10	9.98666e-09	12.0046
HMG20A	0.826327	3.49116	6.54645	7.99934e-10	1.00061e-08	12.002
RRN3	0.643031	5.57953	6.5452	8.05178e-10	1.00644e-08	11.9957
ZBTB26	0.72475	3.01252	6.54469	8.07365e-10	1.00844e-08	11.993
FAM120A	0.644786	6.44136	6.54441	8.08533e-10	1.00864e-08	11.9916
PPP6C	0.557321	5.7911	6.54437	8.08694e-10	1.00864e-08	11.9914
TFEC	0.915721	2.12515	6.54391	8.10651e-10	1.01035e-08	11.9891
SKA3	0.984021	4.31356	6.54309	8.14157e-10	1.01398e-08	11.9849
ETV7	1.21761	3.8458	6.53991	8.27854e-10	1.02872e-08	11.9687
RTL6	0.927595	4.89196	6.53988	8.27993e-10	1.02872e-08	11.9686
GTPBP1	0.594184	4.9146	6.53987	8.28065e-10	1.02872e-08	11.9685
STAU1	0.637414	7.23097	6.53979	8.28376e-10	1.02872e-08	11.9681
RBM26	0.65944	4.35589	6.53961	8.29189e-10	1.02898e-08	11.9672
PPP4R2	0.617617	5.18625	6.53798	8.36285e-10	1.03704e-08	11.9589
SFPQ	0.477835	7.28398	6.53772	8.3745e-10	1.03774e-08	11.9576
CD83	1.05136	5.2553	6.5372	8.39714e-10	1.0398e-08	11.9549
DNAJC10	0.742828	4.53272	6.53593	8.45352e-10	1.04602e-08	11.9485
RSBN1	0.773978	3.77259	6.53493	8.49808e-10	1.05078e-08	11.9434
PTPN1	0.662669	5.89004	6.53412	8.53412e-10	1.05448e-08	11.9393
LPIN2	0.955999	4.34459	6.53394	8.54209e-10	1.05471e-08	11.9384
AGO3	0.60259	2.48774	6.53089	8.6799e-10	1.07096e-08	11.9228
CDC25C	0.811376	3.11324	6.52696	8.86103e-10	1.09252e-08	11.9028
UVRAG	0.687823	4.21151	6.52526	8.94015e-10	1.10149e-08	11.8942
SEL1L3	1.08969	4.71732	6.52444	8.97877e-10	1.10546e-08	11.89
GIGYF2	0.658173	3.95333	6.5237	9.01339e-10	1.10892e-08	11.8863
CREB1	0.682863	3.93993	6.52231	9.07938e-10	1.11624e-08	11.8792
ATRX	0.831262	3.66239	6.52193	9.09779e-10	1.11771e-08	11.8773
DHFR	0.789413	3.74429	6.52067	9.15802e-10	1.12431e-08	11.8709
FKBP15	0.553714	4.21161	6.51929	9.22446e-10	1.13166e-08	11.8639
KBTBD2	0.600146	5.28206	6.51895	9.24098e-10	1.13288e-08	11.8621
CAD	0.814228	5.39484	6.5184	9.26729e-10	1.13529e-08	11.8594
ZNF443	0.704385	2.94482	6.5164	9.36516e-10	1.14647e-08	11.8492
ZNF700	0.735284	3.23321	6.51622	9.37396e-10	1.14673e-08	11.8483
TADA1	0.705898	4.56709	6.51362	9.50268e-10	1.16165e-08	11.8351
ABCF1	0.655565	6.60635	6.51324	9.52171e-10	1.16315e-08	11.8331
MTCH2	0.58347	7.14716	6.51202	9.58244e-10	1.16974e-08	11.827
CBFA2T2	0.69236	3.94431	6.51013	9.67769e-10	1.18053e-08	11.8174
PPTC7	0.843961	4.10623	6.50969	9.70025e-10	1.18244e-08	11.8151
ATXN1L	0.882991	4.4047	6.50804	9.7844e-10	1.19185e-08	11.8068
HBP1	0.845509	4.44817	6.50786	9.79352e-10	1.19212e-08	11.8059
FBXO30	0.659954	3.30429	6.50632	9.8731e-10	1.20096e-08	11.798
PPT1	0.615367	7.72161	6.5043	9.97788e-10	1.21285e-08	11.7878
TPM3	0.606302	6.92361	6.50387	1.00002e-09	1.2147e-08	11.7856
HERC5	1.17073	3.94582	6.50372	1.00084e-09	1.21484e-08	11.7848
CUL2	0.683406	5.19272	6.50187	1.01055e-09	1.22577e-08	11.7755
IMMT	0.572344	6.76508	6.50112	1.01455e-09	1.22923e-08	11.7717
USP39	0.560391	6.15948	6.50106	1.01484e-09	1.22923e-08	11.7714
MAPK8	0.671146	3.80936	6.50027	1.01905e-09	1.23347e-08	11.7674
UBE3A	0.684513	3.67914	6.50005	1.02023e-09	1.23402e-08	11.7663
ZNF131	0.698409	4.1121	6.4986	1.02797e-09	1.24252e-08	11.7589
PIGW	0.722874	4.01051	6.49832	1.02952e-09	1.24351e-08	11.7575
TMEM183A	0.628241	5.50748	6.49755	1.03368e-09	1.24715e-08	11.7536
WDR47	0.805536	3.87874	6.49749	1.03398e-09	1.24715e-08	11.7533
MFSD14B	0.685613	6.11406	6.48966	1.07721e-09	1.29838e-08	11.7136
SVIP	0.909	4.44692	6.48909	1.08042e-09	1.30134e-08	11.7107
ZNF304	0.770315	3.56827	6.48896	1.08118e-09	1.30134e-08	11.71
ABHD3	0.734423	4.1004	6.48851	1.08372e-09	1.30274e-08	11.7077
SNX27	0.650083	3.83314	6.48848	1.08385e-09	1.30274e-08	11.7076
DBT	0.641445	3.45017	6.48825	1.08519e-09	1.30344e-08	11.7064
SNRNP48	0.731032	3.38804	6.48777	1.08793e-09	1.30546e-08	11.704
ZNF253	0.792981	3.55327	6.48768	1.08839e-09	1.30546e-08	11.7036
KDM3A	0.788284	4.30595	6.48678	1.09354e-09	1.31072e-08	11.699
ZNHIT1	-0.653782	5.52858	-6.48059	1.12947e-09	1.35285e-08	11.6677
INPP5B	0.745297	2.97602	6.47972	1.13466e-09	1.35812e-08	11.6632
SESTD1	0.897651	4.30701	6.47882	1.14e-09	1.36356e-08	11.6587
VCP	0.522298	7.31707	6.47612	1.15621e-09	1.38199e-08	11.645
KIF3B	0.72787	5.36063	6.47437	1.16678e-09	1.39366e-08	11.6362
UBE3C	0.735922	5.43219	6.47415	1.16812e-09	1.39429e-08	11.6351
INTS13	0.826763	5.59616	6.47287	1.17595e-09	1.40266e-08	11.6286
MFHAS1	0.840823	4.14587	6.47124	1.18605e-09	1.41373e-08	11.6203
ZC3H15	0.613816	6.59858	6.46888	1.20073e-09	1.43025e-08	11.6084
NSF	0.570284	4.99394	6.46712	1.21182e-09	1.44246e-08	11.5995
RAB3GAP1	0.644147	5.18196	6.46576	1.22046e-09	1.45121e-08	11.5926
CSDE1	0.737692	8.72263	6.46569	1.22086e-09	1.45121e-08	11.5923
CENPC	0.640356	3.09832	6.46303	1.23794e-09	1.47049e-08	11.5788
ZNF623	0.804117	4.68714	6.46177	1.24613e-09	1.47919e-08	11.5725
CSTF2	0.617266	4.81908	6.45749	1.27423e-09	1.51151e-08	11.5509
HSPA4	0.549149	6.62899	6.45492	1.29143e-09	1.53086e-08	11.5379
CNTLN	0.841357	2.17203	6.45462	1.29345e-09	1.5322e-08	11.5364
ADAMDEC1	1.59456	3.98221	6.4543	1.29559e-09	1.53368e-08	11.5348
TTI2	0.611363	3.21191	6.45126	1.31631e-09	1.55713e-08	11.5194
NBPF1	0.719761	2.31055	6.44933	1.32963e-09	1.57182e-08	11.5096
GXYLT1	0.699573	3.67449	6.44889	1.33264e-09	1.57428e-08	11.5074
PPP1R15B	0.641062	5.81362	6.44771	1.34087e-09	1.58293e-08	11.5015
OSBPL8	0.940058	4.66179	6.44733	1.34353e-09	1.58498e-08	11.4996
NHEJ1	0.491469	1.20334	6.44604	1.35258e-09	1.59457e-08	11.493
COPG2	0.819984	4.96019	6.44569	1.35509e-09	1.59643e-08	11.4913
TRAPPC11	0.683971	4.44862	6.44502	1.35979e-09	1.60087e-08	11.4879
PCM1	0.818698	4.90118	6.44389	1.36783e-09	1.60924e-08	11.4822
MAML1	0.678106	5.12147	6.4433	1.37205e-09	1.61309e-08	11.4792
ESRP1	0.948183	6.96511	6.44232	1.37904e-09	1.61947e-08	11.4743
ZNF140	0.687826	3.33271	6.44222	1.37982e-09	1.61947e-08	11.4737
CSNK1G1	0.654474	3.32037	6.44215	1.38029e-09	1.61947e-08	11.4734
RIOK3	0.75272	5.68517	6.44151	1.38488e-09	1.62305e-08	11.4702
UEVLD	0.685674	3.93588	6.44146	1.38523e-09	1.62305e-08	11.4699
CMTR1	0.699736	5.36925	6.43983	1.39707e-09	1.63473e-08	11.4617
ASCC1	0.567756	4.12909	6.43983	1.3971e-09	1.63473e-08	11.4617
ZKSCAN2	0.600951	2.17415	6.43784	1.41158e-09	1.65049e-08	11.4517
DNAJC11	0.710714	4.46344	6.43772	1.41249e-09	1.65049e-08	11.4511
B3GALNT2	0.671033	3.497	6.4362	1.42372e-09	1.66249e-08	11.4434
GTPBP4	0.821591	5.99286	6.43557	1.42836e-09	1.66677e-08	11.4403
ERGIC2	0.717726	4.95437	6.43443	1.43688e-09	1.67559e-08	11.4345
APC	0.764455	3.08753	6.43402	1.43997e-09	1.67805e-08	11.4324
SRP9	0.648061	8.20954	6.43368	1.44249e-09	1.67985e-08	11.4307
CCL8	1.48384	4.27933	6.43275	1.44948e-09	1.68685e-08	11.426
MSL1	0.679872	5.43369	6.43047	1.46681e-09	1.70586e-08	11.4145
CHERP	0.69308	4.29532	6.42787	1.4868e-09	1.72794e-08	11.4014
ATF2	0.690584	4.82577	6.42678	1.49527e-09	1.73661e-08	11.3959
SNIP1	0.556329	3.77186	6.42337	1.52196e-09	1.76642e-08	11.3788
NME3	-0.971077	5.81947	-6.42248	1.52905e-09	1.77346e-08	11.3743
UPF3B	0.715988	4.65931	6.4219	1.53366e-09	1.77668e-08	11.3714
PGM3	0.69194	4.38728	6.42187	1.5339e-09	1.77668e-08	11.3712
PRMT5	0.803746	4.44081	6.42044	1.54539e-09	1.78878e-08	11.364
USP32	0.714502	4.06357	6.41847	1.56125e-09	1.80593e-08	11.3541
CANX	0.646758	8.56966	6.41778	1.56688e-09	1.81122e-08	11.3506
KANSL3	0.614207	4.71468	6.41695	1.57362e-09	1.8178e-08	11.3464
SYNRG	0.680305	3.48781	6.41575	1.58351e-09	1.82799e-08	11.3404
C9orf72	0.711873	2.7712	6.41483	1.5911e-09	1.83552e-08	11.3357
B3GALNT1	0.782764	3.67079	6.41167	1.6174e-09	1.86461e-08	11.3199
NCOA4	0.712934	7.21519	6.41004	1.63113e-09	1.87919e-08	11.3117
KDM2A	0.604954	5.75452	6.40915	1.63868e-09	1.88662e-08	11.3072
PLAA	0.74677	5.12334	6.40719	1.65546e-09	1.90466e-08	11.2973
HNRNPA3	0.57169	7.34454	6.40553	1.66985e-09	1.91994e-08	11.289
SMNDC1	0.567245	4.66387	6.40423	1.68116e-09	1.93165e-08	11.2824
AP1G1	0.732879	5.08019	6.40348	1.68768e-09	1.93784e-08	11.2787
SNX10	0.870433	4.09021	6.40318	1.69029e-09	1.93955e-08	11.2772
RSAD2	1.43789	4.51886	6.40276	1.69399e-09	1.9425e-08	11.2751
WDR36	0.630861	3.87571	6.40136	1.70637e-09	1.9554e-08	11.268
ZNF490	0.40878	1.89239	6.40102	1.70939e-09	1.95755e-08	11.2663
C11orf58	0.557006	5.48253	6.39719	1.74371e-09	1.99553e-08	11.247
HJURP	0.901074	4.64827	6.39509	1.76282e-09	2.01606e-08	11.2365
CENPA	1.01613	4.77763	6.39477	1.7657e-09	2.01802e-08	11.2349
BMP2K	0.680216	2.21271	6.39431	1.76994e-09	2.02151e-08	11.2326
CALU	0.926107	7.57121	6.39352	1.77715e-09	2.0284e-08	11.2286
CLCC1	0.547705	3.26517	6.39335	1.77873e-09	2.02886e-08	11.2278
CNOT6L	0.731727	4.07633	6.39308	1.78121e-09	2.03035e-08	11.2264
FECH	0.69715	3.57615	6.39004	1.80955e-09	2.06128e-08	11.2111
CUL5	0.743547	4.25193	6.38981	1.81173e-09	2.0624e-08	11.21
TICRR	0.885269	2.91562	6.38954	1.81422e-09	2.06386e-08	11.2087
METTL14	0.596648	3.52755	6.38869	1.82229e-09	2.07168e-08	11.2044
RBBP9	0.902429	4.95735	6.38821	1.82682e-09	2.07545e-08	11.202
PLSCR1	1.01322	5.7419	6.38709	1.8374e-09	2.0861e-08	11.1964
ZYG11A	1.04784	2.47162	6.38637	1.84435e-09	2.09262e-08	11.1927
BTN3A2	0.905673	4.86992	6.38615	1.84643e-09	2.09359e-08	11.1916
TAOK1	0.834848	4.14696	6.38479	1.85952e-09	2.10705e-08	11.1848
MTDH	0.727494	6.62617	6.38397	1.86743e-09	2.11462e-08	11.1807
ROCK2	0.794369	4.68911	6.38374	1.86967e-09	2.11576e-08	11.1795
PANK2	0.576624	3.69433	6.38111	1.8953e-09	2.14335e-08	11.1663
NDUFS1	0.685593	4.65283	6.3791	1.91513e-09	2.16436e-08	11.1562
SLC30A9	0.71915	5.01872	6.37852	1.92086e-09	2.16942e-08	11.1533
PGF	-0.880994	2.72373	-6.37809	1.92517e-09	2.17285e-08	11.1512
ZMIZ2	0.661245	6.04782	6.37711	1.93499e-09	2.18123e-08	11.1462
CYLD	0.726586	4.01623	6.37706	1.93544e-09	2.18123e-08	11.146
FASTKD2	0.58097	4.00689	6.37697	1.93639e-09	2.18123e-08	11.1455
CASC3	0.708728	5.79781	6.3768	1.93805e-09	2.18167e-08	11.1447
FAM161A	0.819192	2.09655	6.37641	1.94195e-09	2.18463e-08	11.1428
SPAG9	0.842906	4.65873	6.37558	1.95034e-09	2.19264e-08	11.1386
AHCYL1	0.650653	6.63357	6.37513	1.95492e-09	2.19635e-08	11.1363
RNF34	0.490248	4.59953	6.37455	1.96079e-09	2.2015e-08	11.1334
TBC1D15	0.656217	4.1748	6.37432	1.96315e-09	2.20273e-08	11.1323
HNRNPH3	0.579182	5.99379	6.37274	1.97926e-09	2.21935e-08	11.1243
ZNF14	0.627506	3.57453	6.37236	1.98317e-09	2.22228e-08	11.1224
ZNHIT6	0.663002	4.28694	6.36942	2.01357e-09	2.25489e-08	11.1077
NFATC2IP	0.543391	4.63877	6.36708	2.03806e-09	2.28082e-08	11.096
HDAC2	0.824717	5.36484	6.36629	2.04648e-09	2.28876e-08	11.092
SIN3A	0.698815	4.47329	6.36474	2.06291e-09	2.30563e-08	11.0843
THAP9	0.58619	2.52154	6.36364	2.07466e-09	2.31727e-08	11.0788
KDM2B	0.600699	3.3628	6.36324	2.07904e-09	2.32065e-08	11.0767
ZDHHC21	0.785292	3.1532	6.36265	2.08531e-09	2.32614e-08	11.0738
TBC1D23	0.705219	4.9418	6.35865	2.1289e-09	2.37323e-08	11.0538
HSPA8	0.842228	9.67103	6.35636	2.15434e-09	2.40003e-08	11.0423
ISG20L2	0.664011	5.84168	6.35414	2.17916e-09	2.42611e-08	11.0312
ZNF619	0.614514	2.29965	6.35364	2.1848e-09	2.43016e-08	11.0287
TFIP11	0.632972	4.06063	6.35357	2.18562e-09	2.43016e-08	11.0283
AP1S2	0.761576	4.08333	6.35321	2.18969e-09	2.43312e-08	11.0265
FBXW2	0.663053	4.47757	6.35245	2.19834e-09	2.44114e-08	11.0227
LARP1	0.618315	6.40307	6.34993	2.2271e-09	2.4715e-08	11.0101
TMF1	0.713881	4.16523	6.34903	2.23746e-09	2.48139e-08	11.0056
SACM1L	0.610299	4.29668	6.3489	2.23899e-09	2.48149e-08	11.005
NCKAP1	0.798548	5.04614	6.34549	2.27873e-09	2.52391e-08	10.9879
AGPS	0.807262	4.11148	6.3453	2.28106e-09	2.52487e-08	10.9869
ZFP64	0.586734	3.76002	6.34507	2.28371e-09	2.52617e-08	10.9858
VPS50	0.591268	3.33865	6.34478	2.28712e-09	2.52832e-08	10.9844
USP13	0.939767	4.13385	6.34364	2.30071e-09	2.5417e-08	10.9786
NEU3	0.70193	3.20578	6.34344	2.30308e-09	2.54269e-08	10.9776
ZNF749	0.690808	2.32727	6.34162	2.3248e-09	2.56503e-08	10.9685
MRPL19	0.539649	4.55689	6.34053	2.3379e-09	2.57784e-08	10.9631
RNF19B	0.827702	5.92732	6.33988	2.34581e-09	2.58489e-08	10.9598
USP36	0.658543	4.80292	6.33825	2.36561e-09	2.60505e-08	10.9517
SSR1	0.712881	6.13893	6.33804	2.36812e-09	2.60615e-08	10.9507
UTP25	0.789006	4.00726	6.33765	2.37292e-09	2.60976e-08	10.9487
ACVR2B	0.717888	2.17748	6.33524	2.40269e-09	2.64081e-08	10.9366
DYNC1LI2	1.00948	4.98256	6.33479	2.40824e-09	2.64523e-08	10.9344
ANKS1A	0.849333	4.60007	6.33404	2.41752e-09	2.65372e-08	10.9307
ICAM1	1.29596	5.7832	6.33208	2.44218e-09	2.67908e-08	10.9209
TMEM140	0.72791	4.72289	6.33037	2.46381e-09	2.70109e-08	10.9123
FYTTD1	0.713532	5.39379	6.32916	2.47914e-09	2.71616e-08	10.9063
SLF2	0.676687	3.81691	6.32859	2.48655e-09	2.72255e-08	10.9034
CDK1	0.902518	5.72133	6.32744	2.50134e-09	2.737e-08	10.8977
DPH2	0.662486	5.36116	6.32413	2.54434e-09	2.78229e-08	10.8812
ZWINT	0.898221	6.07306	6.3239	2.54733e-09	2.78242e-08	10.8801
KMT2A	0.724277	3.11214	6.32386	2.54791e-09	2.78242e-08	10.8798
RHBDD1	0.517681	3.85815	6.32375	2.54931e-09	2.78242e-08	10.8793
FBXL15	-0.805503	3.33939	-6.32334	2.55471e-09	2.78619e-08	10.8773
ZNF782	0.549892	1.94963	6.32317	2.55701e-09	2.78619e-08	10.8764
RHNO1	0.770567	5.79	6.32312	2.55762e-09	2.78619e-08	10.8762
GNL3	0.518616	6.79409	6.32212	2.5708e-09	2.79878e-08	10.8712
RNASEH1	0.688546	4.34037	6.32175	2.57582e-09	2.80247e-08	10.8693
VANGL1	0.779261	4.26538	6.31965	2.60384e-09	2.83116e-08	10.8588
TFDP1	0.986344	6.94186	6.31921	2.6097e-09	2.83575e-08	10.8566
DROSHA	0.714204	5.01173	6.31607	2.65231e-09	2.88022e-08	10.841
SPTAN1	0.685056	6.00326	6.31582	2.65564e-09	2.88202e-08	10.8398
SLC25A19	0.633583	3.44922	6.31567	2.65768e-09	2.88241e-08	10.839
SPATA5	0.656221	2.33633	6.3151	2.66559e-09	2.88917e-08	10.8361
CEBPG	0.71512	6.03429	6.31282	2.69699e-09	2.92137e-08	10.8248
KLHDC10	0.683069	5.17021	6.31247	2.70187e-09	2.92374e-08	10.823
UBA3	0.582035	5.33596	6.31234	2.70373e-09	2.92374e-08	10.8224
ALG6	0.628479	3.92343	6.3123	2.70427e-09	2.92374e-08	10.8222
TUBGCP3	0.81691	4.22548	6.31168	2.71295e-09	2.93128e-08	10.8191
BTAF1	0.798712	4.08092	6.31004	2.73597e-09	2.95429e-08	10.8109
TLR1	1.04939	3.44844	6.30974	2.7402e-09	2.95701e-08	10.8094
ARNT	0.704792	5.27134	6.3075	2.77191e-09	2.98935e-08	10.7983
ZNF326	0.629262	3.57382	6.3046	2.81359e-09	3.03241e-08	10.7838
MACF1	0.925331	4.49196	6.304	2.82235e-09	3.03995e-08	10.7808
CLEC4E	1.13724	2.29666	6.30375	2.82604e-09	3.04202e-08	10.7796
GTF2H1	0.601365	4.45173	6.30282	2.8396e-09	3.0547e-08	10.7749
SNRPD3	0.702014	5.62955	6.30145	2.85963e-09	3.07433e-08	10.7681
ZNF611	0.719008	2.57113	6.3007	2.87075e-09	3.08436e-08	10.7644
TNFRSF9	0.844749	1.85588	6.29833	2.90584e-09	3.1201e-08	10.7526
ZNF695	0.92968	2.00199	6.29614	2.93888e-09	3.15362e-08	10.7417
AKAP7	0.697091	2.7828	6.29544	2.94946e-09	3.163e-08	10.7382
EPC2	0.754262	4.22713	6.29478	2.95939e-09	3.1698e-08	10.7349
DDX31	0.568984	3.78061	6.29478	2.95948e-09	3.1698e-08	10.7349
FAM111A	0.748417	4.24093	6.29407	2.97024e-09	3.17934e-08	10.7314
NOL6	0.570231	5.26517	6.29343	2.98003e-09	3.18783e-08	10.7282
ATMIN	0.655773	5.4534	6.29181	3.00503e-09	3.21259e-08	10.7201
MAPK1	0.730433	6.25891	6.28881	3.05176e-09	3.26052e-08	10.7052
UFL1	0.766373	4.98317	6.28606	3.0952e-09	3.30488e-08	10.6915
CSNK1A1	0.841555	4.80664	6.28528	3.10751e-09	3.31593e-08	10.6877
STRAP	0.757315	7.90317	6.28516	3.10941e-09	3.31593e-08	10.6871
AGFG1	0.697336	5.09541	6.28433	3.12279e-09	3.32815e-08	10.6829
KRAS	0.814366	4.80983	6.28419	3.12503e-09	3.32834e-08	10.6822
OSBPL1A	0.933179	4.64087	6.28408	3.12684e-09	3.32834e-08	10.6817
LEMD3	0.721874	4.2679	6.28366	3.13353e-09	3.3334e-08	10.6796
TMEM123	0.946384	8.40682	6.28314	3.14184e-09	3.34017e-08	10.677
SFMBT1	0.725088	3.51155	6.28124	3.17277e-09	3.36953e-08	10.6676
DNAJC2	0.624787	4.4173	6.2811	3.17509e-09	3.36953e-08	10.6668
MFSD1	0.613834	5.84181	6.28108	3.17533e-09	3.36953e-08	10.6668
AZIN1	0.782584	7.03637	6.27912	3.20741e-09	3.40148e-08	10.657
ZNF776	0.783825	3.37567	6.27892	3.21083e-09	3.40301e-08	10.656
RPAP2	0.605468	2.71963	6.27831	3.22085e-09	3.41152e-08	10.653
PKP2	1.12293	3.71937	6.2778	3.22936e-09	3.41843e-08	10.6504
ERCC4	0.638555	2.4121	6.27749	3.23438e-09	3.42164e-08	10.6489
RGP1	0.767095	3.99298	6.27731	3.23746e-09	3.4228e-08	10.648
PNN	0.642673	6.27091	6.27671	3.24748e-09	3.43128e-08	10.645
IFNG	1.06743	1.30397	6.27509	3.27454e-09	3.45775e-08	10.637
SMU1	0.595988	5.3834	6.27292	3.31115e-09	3.4926e-08	10.6262
TOM1L1	0.889955	3.40316	6.2729	3.31159e-09	3.4926e-08	10.6261
ZSCAN25	0.495052	3.22477	6.2722	3.3235e-09	3.50301e-08	10.6226
KLHL5	0.904181	4.24368	6.27198	3.32731e-09	3.50487e-08	10.6215
FZD6	1.05269	5.70606	6.27063	3.35028e-09	3.52691e-08	10.6149
LARP4B	0.661184	5.09097	6.2702	3.35769e-09	3.53199e-08	10.6127
PHC3	0.763896	3.57409	6.27012	3.35921e-09	3.53199e-08	10.6123
RNF14	0.541574	5.06329	6.26984	3.364e-09	3.53487e-08	10.6109
STAU2	0.694521	4.18176	6.26944	3.37082e-09	3.53987e-08	10.609
VAMP7	0.705016	6.1647	6.26886	3.38095e-09	3.54835e-08	10.6061
ETNK1	0.816158	4.07663	6.26786	3.39838e-09	3.56446e-08	10.6011
TBC1D4	0.83214	4.6223	6.2677	3.40111e-09	3.56516e-08	10.6003
C5orf51	0.708932	4.70658	6.26733	3.40761e-09	3.5698e-08	10.5985
UBE2D2	0.435722	6.37949	6.2652	3.44507e-09	3.60684e-08	10.5879
ZNF430	0.696519	2.63544	6.26497	3.44904e-09	3.60881e-08	10.5868
TMEM245	0.768939	4.45096	6.26343	3.47647e-09	3.6353e-08	10.5791
ZBTB34	0.61588	3.01036	6.26245	3.49394e-09	3.65135e-08	10.5742
ARHGEF11	0.804104	5.18654	6.26222	3.49815e-09	3.65353e-08	10.5731
LARP1B	0.601323	3.27504	6.26178	3.50598e-09	3.65739e-08	10.5709
SLC25A36	0.708361	4.48603	6.26177	3.50609e-09	3.65739e-08	10.5709
UGGT1	0.737761	5.15362	6.25652	3.60174e-09	3.75488e-08	10.5448
BDP1	0.823293	3.22554	6.25588	3.6137e-09	3.76507e-08	10.5416
RIOK1	0.843126	5.57385	6.25423	3.64426e-09	3.79461e-08	10.5335
AP4E1	0.634638	2.91124	6.25373	3.65376e-09	3.8022e-08	10.531
EXOC5	0.719208	4.144	6.25241	3.67837e-09	3.8255e-08	10.5245
METAP1	0.641009	5.54033	6.25181	3.68986e-09	3.83513e-08	10.5215
DIS3	0.687058	4.06698	6.25057	3.71323e-09	3.85709e-08	10.5153
TNKS2	0.742264	5.1277	6.24939	3.73574e-09	3.87814e-08	10.5095
ZNF519	0.531344	1.11975	6.24854	3.75215e-09	3.89283e-08	10.5053
FRYL	0.815429	3.27716	6.24772	3.76784e-09	3.90675e-08	10.5012
MTREX	0.642387	4.73737	6.24694	3.78306e-09	3.92017e-08	10.4973
CCNB1	0.789542	6.56653	6.24577	3.80577e-09	3.94133e-08	10.4915
MOB1B	0.728774	3.87079	6.24399	3.84046e-09	3.97487e-08	10.4827
THUMPD1	0.647336	5.01968	6.24323	3.85562e-09	3.98816e-08	10.4789
FSD1L	0.682724	1.6428	6.24208	3.87833e-09	4.00924e-08	10.4733
FOCAD	0.772025	3.87755	6.23938	3.93231e-09	4.0626e-08	10.4599
SOGA1	0.761415	4.53745	6.23916	3.93669e-09	4.06469e-08	10.4588
HEATR5B	0.671285	4.15277	6.23805	3.95917e-09	4.08544e-08	10.4533
FLVCR1	0.756173	3.74944	6.23747	3.97094e-09	4.09514e-08	10.4504
ZNF197	0.59677	3.21372	6.23523	4.01675e-09	4.1399e-08	10.4393
C16orf70	0.568769	3.61693	6.2345	4.0317e-09	4.15282e-08	10.4357
WDR53	0.624852	4.57841	6.2338	4.04604e-09	4.1651e-08	10.4323
TFDP2	0.709186	4.03843	6.23177	4.08836e-09	4.20568e-08	10.4222
CCDC134	0.775609	3.08326	6.23163	4.09127e-09	4.20568e-08	10.4215
TBC1D14	0.972626	3.45222	6.23156	4.09279e-09	4.20568e-08	10.4212
FIP1L1	0.517928	3.56136	6.23121	4.1001e-09	4.21067e-08	10.4195
CUL4A	0.755647	5.6226	6.2305	4.11505e-09	4.22351e-08	10.4159
BAG4	0.880707	4.36534	6.23027	4.11991e-09	4.22598e-08	10.4148
ARL6	0.643924	2.53134	6.22917	4.14302e-09	4.24715e-08	10.4094
EXO5	0.582646	2.80154	6.22902	4.14619e-09	4.24787e-08	10.4086
ATP2A2	0.734255	6.13324	6.22857	4.15578e-09	4.25517e-08	10.4064
CAMKK2	0.534169	5.12586	6.22842	4.159e-09	4.25593e-08	10.4057
KMT2D	0.799975	3.77536	6.22791	4.16989e-09	4.26453e-08	10.4031
NXT2	0.750562	4.61989	6.22726	4.18375e-09	4.27618e-08	10.3999
METAP2	0.535352	5.99351	6.2267	4.19565e-09	4.28549e-08	10.3972
SART3	0.525441	4.49544	6.2266	4.19784e-09	4.28549e-08	10.3967
ZNF566	0.703441	2.60031	6.22566	4.21803e-09	4.30354e-08	10.392
NUP88	0.600583	4.52115	6.225	4.2323e-09	4.31554e-08	10.3888
FANCM	0.558594	1.97385	6.22484	4.23592e-09	4.31668e-08	10.3879
ZNF281	0.81907	4.50012	6.22377	4.259e-09	4.33763e-08	10.3827
TTC21B	0.6211	2.95146	6.22272	4.28205e-09	4.35853e-08	10.3775
ANP32E	1.19773	7.08196	6.22222	4.29292e-09	4.36701e-08	10.375
MAT2A	0.679891	6.55463	6.22188	4.30044e-09	4.37207e-08	10.3733
CNOT7	0.71786	4.78439	6.2215	4.30872e-09	4.37523e-08	10.3714
CAMSAP2	0.813521	4.8626	6.22142	4.31042e-09	4.37523e-08	10.3711
HACL1	0.597461	3.97594	6.22137	4.31161e-09	4.37523e-08	10.3708
ARMC1	0.656003	5.9088	6.22127	4.31371e-09	4.37523e-08	10.3703
PIGA	0.640375	3.08695	6.22036	4.33401e-09	4.39323e-08	10.3658
DENND11	0.906809	4.83504	6.2192	4.35964e-09	4.41661e-08	10.3601
ZNF496	0.780193	4.16953	6.21873	4.37005e-09	4.42417e-08	10.3578
ELF4	0.901577	4.84932	6.21856	4.37387e-09	4.42417e-08	10.3569
DTD2	0.669302	2.16302	6.21852	4.37481e-09	4.42417e-08	10.3567
SLC7A1	0.936432	5.22355	6.21737	4.40056e-09	4.44665e-08	10.351
FNBP1L	0.855253	5.96228	6.2173	4.40222e-09	4.44665e-08	10.3507
PNPLA8	0.65255	4.5435	6.21718	4.40496e-09	4.44681e-08	10.3501
TRIM32	0.706373	4.10713	6.21539	4.4453e-09	4.48491e-08	10.3413
CCDC77	0.880162	4.07775	6.21457	4.46395e-09	4.50109e-08	10.3372
PRUNE1	0.72774	6.03255	6.21424	4.47159e-09	4.50615e-08	10.3356
DCTN4	0.568594	5.04768	6.21391	4.47897e-09	4.51095e-08	10.334
SHQ1	0.499432	3.57119	6.21254	4.51042e-09	4.53996e-08	10.3272
PSMD11	0.593838	5.85487	6.21	4.5694e-09	4.59664e-08	10.3146
APPBP2	0.662347	3.96062	6.20913	4.58963e-09	4.61429e-08	10.3103
UBN1	0.70125	5.04993	6.20897	4.59335e-09	4.61534e-08	10.3096
CCNI	0.70175	8.2307	6.20744	4.62954e-09	4.64899e-08	10.302
ERLIN1	0.653048	5.5784	6.20584	4.66742e-09	4.68429e-08	10.2941
CLPX	0.597923	4.92435	6.20391	4.71351e-09	4.7278e-08	10.2846
INAFM1	-0.761677	5.07585	-6.20353	4.72267e-09	4.73422e-08	10.2827
MARS1	0.502897	5.72102	6.20251	4.74733e-09	4.75617e-08	10.2777
KRR1	0.623801	3.37347	6.20207	4.75811e-09	4.7642e-08	10.2755
EZH2	0.825406	5.02915	6.20063	4.79313e-09	4.79647e-08	10.2684
TRIM69	0.711704	4.01897	6.20033	4.80049e-09	4.80104e-08	10.2669
RAP2A	0.861423	5.33859	6.19856	4.84393e-09	4.84168e-08	10.2582
ZRANB1	0.839711	3.38123	6.19731	4.87485e-09	4.86975e-08	10.252
BOD1L1	0.808861	3.53082	6.19693	4.8845e-09	4.87657e-08	10.2501
ZNF268	0.583103	2.6554	6.19364	4.967e-09	4.95606e-08	10.2339
NUP42	0.590835	3.17412	6.19347	4.9713e-09	4.95747e-08	10.2331
SMAD4	0.711932	3.99318	6.19286	4.9869e-09	4.97015e-08	10.2301
KLHL23	1.05056	3.633	6.19235	4.99981e-09	4.98013e-08	10.2276
IWS1	0.532947	5.65442	6.19199	5.00903e-09	4.98643e-08	10.2258
HYOU1	0.8988	6.36352	6.19095	5.03543e-09	5.00982e-08	10.2207
ASF1B	0.814864	5.86779	6.18918	5.0811e-09	5.05233e-08	10.212
NSD3	0.865551	4.37175	6.18883	5.09031e-09	5.05857e-08	10.2102
CLTC	0.711115	7.09003	6.18793	5.11364e-09	5.07685e-08	10.2058
KANSL1	0.622472	3.06087	6.18789	5.11461e-09	5.07685e-08	10.2056
SOAT1	0.820961	4.80293	6.18757	5.12297e-09	5.08222e-08	10.204
PIKFYVE	0.794467	3.47365	6.18575	5.17064e-09	5.12656e-08	10.1951
XRCC6	0.519558	8.5871	6.18415	5.21296e-09	5.16554e-08	10.1872
GCNT2	1.10279	4.0192	6.18393	5.21898e-09	5.16558e-08	10.1861
LSM14A	0.698602	7.08273	6.18393	5.219e-09	5.16558e-08	10.1861
ZNF524	-0.690564	4.77001	-6.18313	5.24009e-09	5.18347e-08	10.1822
DEFB131B	0.640015	0.984538	6.18289	5.24664e-09	5.18697e-08	10.1809
N4BP2	0.814517	2.57484	6.18185	5.27434e-09	5.21137e-08	10.1759
WAC	0.649711	5.67524	6.18092	5.29945e-09	5.22948e-08	10.1713
TRPM7	0.71139	3.4394	6.18085	5.30143e-09	5.22948e-08	10.1709
KCNJ10	0.72107	0.930714	6.18083	5.30179e-09	5.22948e-08	10.1708
NONO	0.608371	7.09031	6.17977	5.33052e-09	5.25481e-08	10.1656
NOTCH2	0.935914	5.35186	6.17949	5.33811e-09	5.25927e-08	10.1642
HP1BP3	0.645529	5.84058	6.17867	5.36042e-09	5.27824e-08	10.1602
B4GALT5	0.778622	6.27716	6.17837	5.36865e-09	5.28332e-08	10.1587
TMEM164	0.771095	4.85226	6.1778	5.3843e-09	5.29569e-08	10.1559
HNRNPH1	0.651624	6.55541	6.17712	5.40296e-09	5.311e-08	10.1526
NUF2	1.05584	4.81727	6.17691	5.40888e-09	5.31379e-08	10.1515
DDB1	0.551822	6.32853	6.17649	5.4204e-09	5.32207e-08	10.1494
SCAF8	0.731667	4.6982	6.17613	5.43031e-09	5.32877e-08	10.1477
ZNF805	0.557875	2.1715	6.17564	5.44394e-09	5.33909e-08	10.1452
PTPN12	0.725293	6.14372	6.17518	5.45667e-09	5.3475e-08	10.143
RFX7	0.686693	2.96226	6.1751	5.45873e-09	5.3475e-08	10.1426
BRWD3	0.748054	2.7088	6.17459	5.47291e-09	5.35835e-08	10.1401
PROSER3	0.72012	2.79828	6.17351	5.50326e-09	5.38499e-08	10.1348
TGOLN2	0.772661	6.86374	6.17318	5.51249e-09	5.39096e-08	10.1331
RFC3	0.81337	4.95306	6.17231	5.53694e-09	5.4118e-08	10.1289
NFKB1	0.753949	5.15975	6.17164	5.55578e-09	5.42713e-08	10.1256
COG5	0.708458	4.13444	6.17114	5.56979e-09	5.43773e-08	10.1231
SLC25A15	0.724776	3.99076	6.17005	5.6009e-09	5.465e-08	10.1178
ARFGEF1	0.834989	4.95614	6.16906	5.62923e-09	5.48953e-08	10.1129
RBPJ	0.506708	5.02717	6.16624	5.71044e-09	5.56557e-08	10.099
WASF2	0.697226	6.80962	6.16526	5.73882e-09	5.59008e-08	10.0942
ZMYM3	0.636341	4.62021	6.16367	5.78562e-09	5.63247e-08	10.0864
PUS7	0.815105	4.79629	6.16348	5.79109e-09	5.63461e-08	10.0855
PHF20L1	0.714627	3.52531	6.16333	5.79535e-09	5.63557e-08	10.0848
ZDHHC23	0.806258	2.75602	6.16132	5.85489e-09	5.69025e-08	10.0749
PRPS1	0.631788	5.34606	6.16111	5.86113e-09	5.6931e-08	10.0738
CBX1	0.725143	6.90538	6.1594	5.91233e-09	5.7396e-08	10.0654
PDP2	0.581043	2.67758	6.15811	5.95125e-09	5.77412e-08	10.0591
KIDINS220	0.783503	4.37643	6.15776	5.96183e-09	5.78113e-08	10.0574
CCT5	0.789135	7.21107	6.15697	5.98581e-09	5.80111e-08	10.0535
EIF4E	0.59594	3.10958	6.15646	6.00145e-09	5.81299e-08	10.051
INTS8	0.654532	4.62366	6.15531	6.03663e-09	5.84378e-08	10.0453
ZNF2	0.515212	2.78438	6.1544	6.06441e-09	5.86737e-08	10.0409
CDKAL1	0.98382	4.47541	6.15305	6.10633e-09	5.90461e-08	10.0342
FAM184A	0.880793	1.75802	6.15293	6.10983e-09	5.90468e-08	10.0337
INVS	0.566285	2.79765	6.15217	6.13346e-09	5.92419e-08	10.0299
HECTD1	0.75276	5.04371	6.15188	6.14252e-09	5.92962e-08	10.0285
REV1	0.647008	3.71696	6.15169	6.1484e-09	5.93197e-08	10.0276
SEPTIN11	0.760889	5.43049	6.15028	6.19256e-09	5.97122e-08	10.0206
CNBP	0.488973	8.41919	6.14919	6.22706e-09	6.00113e-08	10.0153
ETV3	0.904145	5.18845	6.14876	6.24054e-09	6.01075e-08	10.0132
PSMC1	0.619459	3.32175	6.14856	6.24687e-09	6.01349e-08	10.0122
CGGBP1	0.643048	5.41557	6.14665	6.30781e-09	6.06876e-08	10.0028
SLC31A1	0.787545	5.60679	6.14407	6.3908e-09	6.14516e-08	9.99018
ZNF557	0.59686	2.83611	6.14393	6.39543e-09	6.14619e-08	9.98948
ZNF778	0.669763	2.12156	6.14233	6.44758e-09	6.19284e-08	9.98163
LRR1	0.641432	4.09923	6.14099	6.49158e-09	6.23162e-08	9.97505
CYB5RL	0.562946	1.82218	6.14068	6.5018e-09	6.23796e-08	9.97353
VKORC1L1	0.608294	5.54395	6.14052	6.50722e-09	6.23968e-08	9.97272
DIMT1	0.595795	2.77739	6.1391	6.55414e-09	6.28118e-08	9.96578
POGK	0.780105	5.80608	6.13822	6.58356e-09	6.30586e-08	9.96145
TMEM184C	0.702757	4.58304	6.13643	6.64362e-09	6.35984e-08	9.95267
SCO1	0.509218	3.26899	6.13624	6.64996e-09	6.36238e-08	9.95174
DENND5A	0.692132	4.70833	6.13467	6.70305e-09	6.40961e-08	9.94406
AMD1	0.802888	5.57549	6.13427	6.7167e-09	6.4191e-08	9.94209
APOOL	0.769503	3.45888	6.13341	6.7461e-09	6.44361e-08	9.93787
ZC3HAV1L	0.794724	3.47027	6.1322	6.78743e-09	6.4795e-08	9.93196
PTPN4	0.558292	2.78434	6.13076	6.83718e-09	6.52337e-08	9.9249
ZNF460	0.662496	1.51071	6.13058	6.8434e-09	6.52568e-08	9.92402
PDS5B	0.718629	3.61164	6.12867	6.90996e-09	6.5855e-08	9.91466
KLHL42	0.78845	4.00572	6.12542	7.02476e-09	6.69121e-08	9.89873
PLK1	0.929597	4.95656	6.12521	7.03201e-09	6.69441e-08	9.89774
SLC35E1	0.581878	5.23295	6.12411	7.07128e-09	6.72808e-08	9.89235
NNT	0.943591	4.02431	6.12397	7.0764e-09	6.72922e-08	9.89165
TERF2	0.507094	4.3055	6.12016	7.21413e-09	6.85641e-08	9.87302
FXR1	0.611642	5.46839	6.11904	7.25522e-09	6.89166e-08	9.86753
MAPK14	0.682169	5.15256	6.11872	7.26698e-09	6.89902e-08	9.86596
TTC17	0.651912	4.73887	6.11823	7.28491e-09	6.91223e-08	9.86358
WDFY1	0.631568	4.72844	6.11781	7.30069e-09	6.92339e-08	9.86149
AREL1	0.602078	4.54604	6.11581	7.37498e-09	6.98999e-08	9.8517
CIPC	0.734687	4.02588	6.11568	7.37978e-09	6.99068e-08	9.85107
PASK	0.645282	2.68199	6.11498	7.40601e-09	7.01168e-08	9.84764
RB1CC1	0.823737	5.34899	6.11415	7.43709e-09	7.03723e-08	9.84359
YTHDF3	0.755598	5.66685	6.11251	7.49918e-09	7.09208e-08	9.83556
LIMS1	0.674171	5.16849	6.1118	7.52613e-09	7.11366e-08	9.83209
BAG5	0.651056	5.3012	6.11095	7.5583e-09	7.14014e-08	9.82796
DHX35	0.569041	3.45671	6.10978	7.60321e-09	7.17863e-08	9.82224
PPP1R14A	-1.27977	2.92595	-6.1084	7.65643e-09	7.22491e-08	9.81549
SLC4A1AP	0.53551	4.77654	6.10718	7.70404e-09	7.26444e-08	9.8095
UBE2K	0.58756	5.86626	6.10711	7.70676e-09	7.26444e-08	9.80916
ZNF675	0.683063	2.64694	6.10543	7.77251e-09	7.32241e-08	9.80095
GTF2A1	0.659995	4.59565	6.10481	7.79679e-09	7.3395e-08	9.79793
DHX33	0.714273	4.32821	6.10475	7.79918e-09	7.3395e-08	9.79764
TRMT2B	0.593031	4.29786	6.10457	7.80637e-09	7.34225e-08	9.79675
SLC36A4	0.786218	2.91057	6.10374	7.83895e-09	7.36787e-08	9.79272
E2F2	0.964695	3.5758	6.10366	7.84217e-09	7.36787e-08	9.79232
PPIL4	0.599254	5.2055	6.10311	7.86396e-09	7.38431e-08	9.78964
FCHSD2	0.634063	4.52077	6.10206	7.90614e-09	7.41987e-08	9.78447
SMG5	0.734271	6.94617	6.10173	7.91924e-09	7.42812e-08	9.78287
PHLDA3	-1.13168	5.00735	-6.10139	7.93294e-09	7.43692e-08	9.7812
TRPS1	1.35547	6.3028	6.10014	7.98311e-09	7.47988e-08	9.77511
SOCS7	0.776105	3.56106	6.0986	8.04525e-09	7.534e-08	9.76761
ZSWIM4	0.935711	2.90408	6.09694	8.11327e-09	7.59356e-08	9.75947
VEZF1	0.889708	5.18139	6.09629	8.1397e-09	7.61416e-08	9.75633
ZNF8	0.609379	2.43522	6.09604	8.15005e-09	7.6197e-08	9.7551
PHLPP2	0.680317	2.2969	6.09572	8.16343e-09	7.62806e-08	9.75352
AGL	0.868055	3.92423	6.09431	8.22173e-09	7.67838e-08	9.74664
AQR	0.622166	3.80884	6.09283	8.28333e-09	7.73171e-08	9.73942
SDCCAG8	0.649117	4.15553	6.09255	8.29489e-09	7.7383e-08	9.73807
MYO6	0.959074	5.43784	6.09012	8.3973e-09	7.82959e-08	9.72621
ZNF550	0.698403	2.88584	6.08935	8.43025e-09	7.85606e-08	9.72243
LRIG2	0.54264	2.79575	6.08903	8.44373e-09	7.86437e-08	9.72088
TTL	0.669431	3.54264	6.08835	8.47294e-09	7.88731e-08	9.71755
GSTCD	0.778248	2.75957	6.08704	8.5288e-09	7.93501e-08	9.7112
NPC1	0.708199	4.34398	6.08453	8.63775e-09	8.03204e-08	9.69893
RRM2	0.884075	4.88022	6.08438	8.64444e-09	8.03391e-08	9.69818
IQGAP3	1.09801	4.94124	6.08402	8.66013e-09	8.04415e-08	9.69643
ZNF791	0.577226	4.0551	6.07983	8.84505e-09	8.21149e-08	9.67601
ANKRD52	0.714635	4.51249	6.07945	8.86187e-09	8.22205e-08	9.67417
MTFR2	0.817722	3.4038	6.07936	8.86598e-09	8.22205e-08	9.67372
HMGB2	0.809288	7.8176	6.07836	8.91079e-09	8.25915e-08	9.66885
EIF4ENIF1	0.494969	3.94387	6.07816	8.91991e-09	8.26316e-08	9.66786
TNPO2	0.584367	5.69017	6.07573	9.02959e-09	8.36027e-08	9.65605
RFC4	0.839793	5.38436	6.07547	9.04165e-09	8.36693e-08	9.65476
GNAI3	0.574547	5.61586	6.07504	9.06124e-09	8.38055e-08	9.65267
KMT2E	0.753214	4.68984	6.07463	9.08014e-09	8.39352e-08	9.65065
MDM1	0.64772	2.6804	6.07366	9.1242e-09	8.42972e-08	9.64598
RBM23	0.510475	4.04591	6.07283	9.16279e-09	8.46084e-08	9.6419
ZKSCAN5	0.498499	3.47063	6.07191	9.2054e-09	8.49562e-08	9.63741
AP1AR	0.710748	3.84232	6.07029	9.28064e-09	8.56047e-08	9.62955
TENT4B	0.618864	2.99851	6.06971	9.30807e-09	8.58117e-08	9.62669
ZNF687	0.683786	5.00876	6.06925	9.3294e-09	8.59623e-08	9.62448
GOSR2	0.455306	3.50328	6.06891	9.3456e-09	8.60655e-08	9.62281
PAPOLA	0.599582	5.61294	6.06847	9.36612e-09	8.62084e-08	9.62069
GABPB1	0.488237	3.97715	6.0665	9.4594e-09	8.70205e-08	9.61111
CDK4	0.700309	6.07215	6.06556	9.50456e-09	8.73892e-08	9.60651
RPS6KC1	0.645541	4.33691	6.06528	9.5179e-09	8.74651e-08	9.60515
TXNDC16	0.983999	3.61949	6.06504	9.52967e-09	8.75024e-08	9.60396
METTL8	0.555544	3.13591	6.06498	9.53213e-09	8.75024e-08	9.60371
GIT2	0.527963	2.06438	6.06455	9.55279e-09	8.76453e-08	9.60161
ERI1	0.702971	3.72115	6.06434	9.56309e-09	8.7693e-08	9.60057
MYD88	0.621961	6.054	6.06357	9.6001e-09	8.79856e-08	9.59684
HSP90AA1	0.769672	9.94669	6.06166	9.69322e-09	8.87918e-08	9.58751
NOMO2	1.00932	2.95359	6.06124	9.71378e-09	8.89327e-08	9.58546
FSBP	0.52748	1.42012	6.05869	9.83902e-09	9.00314e-08	9.57309
FPR2	0.560363	0.776765	6.05786	9.88003e-09	9.03587e-08	9.56907
BRPF3	0.90842	4.91139	6.05569	9.98857e-09	9.13029e-08	9.55851
AFTPH	0.638659	5.45391	6.05534	1.00062e-08	9.14158e-08	9.5568
RBM33	0.533196	3.79645	6.05498	1.00246e-08	9.15345e-08	9.55503
RP2	0.693372	4.04952	6.05433	1.00571e-08	9.17833e-08	9.5519
FCGR3A	1.05183	6.38205	6.05167	1.01927e-08	9.29712e-08	9.53896
RANBP6	0.747204	4.43807	6.05054	1.02509e-08	9.34526e-08	9.53346
ZNF638	0.527067	5.13003	6.05017	1.02702e-08	9.35791e-08	9.53164
DARS1	0.587643	6.07201	6.04998	1.02798e-08	9.36167e-08	9.53074
IPMK	0.744586	3.25873	6.04874	1.03443e-08	9.41541e-08	9.5247
UTP4	0.650633	5.14728	6.04775	1.03957e-08	9.45587e-08	9.5199
POM121C	0.579746	4.11837	6.04767	1.03997e-08	9.45587e-08	9.51953
MARCHF1	0.700061	2.46822	6.04531	1.05242e-08	9.564e-08	9.50803
ARHGAP5	1.11556	3.21252	6.04474	1.0554e-08	9.58605e-08	9.5053
CD163	1.18408	4.79389	6.04376	1.06066e-08	9.6287e-08	9.5005
POLH	0.787738	4.13657	6.04093	1.07585e-08	9.76145e-08	9.48676
VPS13B	0.792262	3.32221	6.04029	1.07931e-08	9.7877e-08	9.48366
TMEM131	0.648733	4.27155	6.03933	1.0845e-08	9.82543e-08	9.47902
UBE2D3	0.529576	6.36895	6.03931	1.08461e-08	9.82543e-08	9.47892
ZMYND11	0.792074	6.1878	6.03777	1.09307e-08	9.89683e-08	9.47142
ITSN2	0.675901	3.75995	6.03738	1.0952e-08	9.91093e-08	9.46953
ARL13B	0.804894	3.19053	6.03721	1.09611e-08	9.91393e-08	9.46873
DENND4A	0.686804	3.05379	6.036	1.10282e-08	9.96745e-08	9.46283
FRS2	0.860234	3.87645	6.03593	1.10318e-08	9.96745e-08	9.46252
MAP4K3	0.686741	4.29756	6.03249	1.12244e-08	1.01361e-07	9.4458
RNF111	0.688305	3.69084	6.03122	1.12962e-08	1.01956e-07	9.43964
ANKRD26	0.643509	2.18664	6.03108	1.13037e-08	1.01971e-07	9.43899
C1orf131	0.571204	3.58923	6.0305	1.13371e-08	1.02218e-07	9.43614
AASDH	0.71555	3.3738	6.03019	1.13545e-08	1.02322e-07	9.43466
ZNF740	0.602316	3.69064	6.02935	1.14023e-08	1.02669e-07	9.4306
STX7	0.514528	3.73585	6.02931	1.1405e-08	1.02669e-07	9.43037
UBE2O	0.558489	5.10625	6.02918	1.14123e-08	1.02673e-07	9.42975
CEP63	0.44421	3.26847	6.02909	1.14174e-08	1.02673e-07	9.42933
ATG9A	0.917807	4.24443	6.02796	1.14826e-08	1.03205e-07	9.42383
PLAC9	-1.14076	2.74355	-6.02753	1.15071e-08	1.03372e-07	9.42176
PCGF5	0.709406	4.21903	6.02677	1.15509e-08	1.03711e-07	9.41809
TXNDC9	0.539066	5.07182	6.02392	1.17177e-08	1.05154e-07	9.40424
FASLG	1.02793	1.78867	6.02234	1.18109e-08	1.05935e-07	9.39659
CFLAR	0.640479	3.91651	6.02142	1.18652e-08	1.06367e-07	9.39216
ZNFX1	0.725791	4.94925	6.02021	1.19378e-08	1.06961e-07	9.38627
KIF21A	0.984928	3.30055	6.01892	1.20148e-08	1.07595e-07	9.38006
ZNF688	-0.567317	3.19438	-6.0179	1.20768e-08	1.08095e-07	9.37508
CERS2	0.925399	6.09137	6.01662	1.21545e-08	1.08733e-07	9.36889
CNOT8	0.569793	5.56714	6.01636	1.21703e-08	1.08818e-07	9.36763
RNF146	0.557596	5.12308	6.01589	1.21992e-08	1.0902e-07	9.36534
GOLGB1	0.742386	5.64205	6.01439	1.22908e-08	1.09755e-07	9.35811
ZNF142	0.56529	3.36798	6.01434	1.22942e-08	1.09755e-07	9.35785
AP3B1	0.539794	5.17602	6.0132	1.23644e-08	1.10324e-07	9.35235
SSR3	0.582551	7.12226	6.01242	1.24132e-08	1.10703e-07	9.34854
ZSCAN22	0.521293	2.29137	6.0121	1.2433e-08	1.1079e-07	9.347
PRIMPOL	0.639888	2.97339	6.01205	1.24359e-08	1.1079e-07	9.34678
MMP28	-1.0198	1.82568	-6.01152	1.24689e-08	1.1099e-07	9.34421
CDCA7L	1.10893	4.21634	6.01149	1.24712e-08	1.1099e-07	9.34403
MARF1	0.656346	4.60109	6.01136	1.24789e-08	1.11001e-07	9.34344
NKAPD1	0.607758	4.44948	6.01026	1.25479e-08	1.11557e-07	9.33812
ACLY	0.670163	6.82022	6.00982	1.25759e-08	1.11748e-07	9.33596
SHCBP1	0.736256	3.43541	6.00723	1.27401e-08	1.13149e-07	9.32343
PPIL1	0.687442	6.40078	6.00401	1.29471e-08	1.14928e-07	9.30786
DHX16	0.605545	5.47367	6.00291	1.30184e-08	1.15501e-07	9.30255
PARN	0.489807	4.77154	5.99972	1.32281e-08	1.17302e-07	9.28712
ZC3H7A	0.605728	4.53355	5.99828	1.33241e-08	1.18092e-07	9.28014
UBE2J1	0.564892	6.49578	5.99613	1.34682e-08	1.19308e-07	9.26974
AMMECR1L	0.650427	4.83273	5.99516	1.35338e-08	1.19827e-07	9.26505
LANCL1	0.786971	5.29075	5.99498	1.35459e-08	1.19872e-07	9.26419
VAV2	0.720343	5.08261	5.99394	1.36162e-08	1.20433e-07	9.25919
TMEM38B	0.873973	3.19051	5.99357	1.36413e-08	1.20593e-07	9.25741
KCTD20	0.74513	5.86763	5.99124	1.38017e-08	1.21948e-07	9.24612
NIF3L1	0.54663	5.44359	5.99099	1.38185e-08	1.22034e-07	9.24494
EIF2S3	0.5595	7.97138	5.9891	1.39497e-08	1.23129e-07	9.23582
KIAA0586	0.532819	2.19952	5.98873	1.3976e-08	1.23298e-07	9.234
HECA	0.605011	5.19993	5.98807	1.40223e-08	1.23643e-07	9.23081
RALBP1	0.796124	5.49103	5.98628	1.41477e-08	1.24686e-07	9.2222
ADAT1	0.693846	4.09821	5.98586	1.41774e-08	1.24883e-07	9.22018
PAFAH1B1	0.559711	4.86956	5.98481	1.42521e-08	1.25476e-07	9.21511
EED	0.468662	3.72722	5.9847	1.42604e-08	1.25486e-07	9.21454
TMTC3	0.729725	3.89695	5.98301	1.43814e-08	1.26486e-07	9.20638
RAB23	1.05365	3.44707	5.98051	1.4562e-08	1.28008e-07	9.19433
LRRC8C	0.953268	3.26408	5.97954	1.46328e-08	1.28565e-07	9.18964
NIPSNAP3A	0.647812	5.08328	5.97814	1.47352e-08	1.294e-07	9.1829
UBFD1	0.659388	5.02815	5.97731	1.47965e-08	1.29871e-07	9.1789
IMPA1	0.707029	3.86835	5.9762	1.48789e-08	1.30528e-07	9.17353
ARFGEF2	0.900539	5.07499	5.97604	1.48906e-08	1.30564e-07	9.17277
PEX1	0.64758	3.11615	5.97511	1.49598e-08	1.31104e-07	9.1683
TM9SF4	0.564202	6.28858	5.97327	1.50982e-08	1.32249e-07	9.15941
MCUB	0.734608	4.57837	5.97176	1.52122e-08	1.33119e-07	9.15214
USP12	0.705093	4.491	5.97175	1.5213e-08	1.33119e-07	9.15209
ZFYVE26	0.545913	3.07129	5.97158	1.52256e-08	1.33162e-07	9.15129
ASF1A	0.621079	5.22259	5.97041	1.53151e-08	1.33877e-07	9.14563
ICE2	0.586034	3.03978	5.9674	1.55473e-08	1.35838e-07	9.1311
RNF6	0.688401	4.93736	5.967	1.55782e-08	1.36039e-07	9.12918
NSUN3	0.501274	2.63025	5.96569	1.56801e-08	1.36859e-07	9.12289
TNRC6B	0.626826	2.99417	5.96509	1.57272e-08	1.372e-07	9.11999
COIL	0.601092	4.8927	5.96441	1.57806e-08	1.37597e-07	9.11671
LMAN1	0.761382	6.69343	5.96405	1.58088e-08	1.37773e-07	9.11499
BTN2A1	0.668364	4.87836	5.96393	1.58182e-08	1.37785e-07	9.11441
PDIA6	0.840952	7.6134	5.96356	1.58474e-08	1.3797e-07	9.11263
MRPS35	0.727688	6.99664	5.96296	1.58953e-08	1.38316e-07	9.10972
TCF12	0.724432	4.67805	5.96201	1.59708e-08	1.38903e-07	9.10515
RCHY1	0.599509	3.43651	5.95935	1.61843e-08	1.40689e-07	9.09232
NLRC5	0.985477	3.91817	5.95736	1.63452e-08	1.42016e-07	9.08277
SEPTIN7	0.543949	5.07608	5.95711	1.63652e-08	1.42118e-07	9.08159
MCM7	0.749199	7.25642	5.95649	1.64161e-08	1.42488e-07	9.07859
YLPM1	0.636291	4.14031	5.95617	1.64426e-08	1.42646e-07	9.07703
IREB2	0.722413	4.1615	5.95184	1.68015e-08	1.45686e-07	9.05618
ABHD18	0.537564	2.55008	5.95071	1.68959e-08	1.46431e-07	9.05077
CCNB2	0.924872	5.71697	5.94907	1.70349e-08	1.47547e-07	9.04286
TVP23B	0.628707	3.77348	5.94898	1.70418e-08	1.47547e-07	9.04247
TRAFD1	0.569654	5.51115	5.94887	1.70512e-08	1.47554e-07	9.04193
HROB	0.649565	3.15843	5.9476	1.71593e-08	1.48415e-07	9.03583
MLX	0.478397	4.99978	5.94729	1.71861e-08	1.48572e-07	9.03433
NFAT5	1.07796	2.9121	5.94713	1.71996e-08	1.48589e-07	9.03357
MAPKAP1	0.489034	5.26219	5.94701	1.721e-08	1.48589e-07	9.03299
ALAS1	0.527458	6.21235	5.94697	1.72139e-08	1.48589e-07	9.03277
ZNF480	0.606408	4.10202	5.94654	1.72501e-08	1.48827e-07	9.03074
POC1B	0.533591	2.7853	5.94638	1.72643e-08	1.48874e-07	9.02994
PSMD14	0.502344	5.33053	5.94531	1.73562e-08	1.49592e-07	9.02482
ZNF621	0.648794	3.48392	5.94462	1.74162e-08	1.50034e-07	9.02149
[truncated: 15,214 more rows]
